# **Epidemiology, ecology and human perceptions of snakebites in a savanna community of northern Ghana**

Yahaya Musah<sup>1</sup>, Evans P.K. Ameade<sup>1,2</sup>, Daniel K. Attuquayefio<sup>1</sup>, Lars H. Holbech<sup>1,\*</sup>

<sup>1</sup> Department of Animal Biology and Conservation Science, University of Ghana, P.O. Box LG 67, Legon, Accra, Ghana.

<sup>2</sup> Department of Pharmacology, University for Development Studies, P.O. Box TL 1350, Tamale, Ghana.

\* Corresponding author's email: l.holbech@gmail.com

**Word Count** (Abstract with references, figures and tables): 7,659

**Abstract:** 344

**Author Summary:** 196

**Figures:** 3

**Tables:** 6

**References:** 59

## 20 **ABSTRACT**

### 21 **Background**

22 Worldwide, snakebite envenomations total ~2.7 million reported cases annually with ~100,000  
23 fatalities. Since 2009, snakebite envenomation has been classified as a very important ‘neglected  
24 tropical disease’ by the World Health Organisation. Despite this emerging awareness, limited efforts  
25 have been geared towards addressing the serious public health implications of snakebites,  
26 particularly in sub-Saharan Africa, where baseline epidemiological data remain incomplete. Due to  
27 poverty as well as limited infrastructure and public health facilities, people in rural Africa, including  
28 Ghana, often have no other choice than to seek treatment from traditional medical practitioners  
29 (TMP). The African ‘snakebite crisis’ is highlighted here using extensive complementary data from  
30 a community-based epidemiological study conducted by snake ecologists in the savanna zone of  
31 northern Ghana.

### 33 **Methodology and findings**

34 Our cross-sectional study included 1,000 residents and 24 TMPs in the Savelugu-Nanton District in  
35 northern Ghana between December 2008 and May 2009, and a 10-year (1999-2008) retrospective  
36 snakebite data from the district hospital. Variables tested included demography, human activity  
37 patterns, seasonality, snake ecology and clinical reports. Complementary data showed higher  
38 snakebite prevalence during the rainy season, and a hump-shaped correlation between rainfall  
39 intensity and snakebite incidences. Almost 6% of respondents had experienced a personal snakebite,  
40 whereas ~60% of respondents had witnessed a total of 799 snakebite cases. Out of a total of 857  
41 reported snakebite cases, 24 (~2.8%) died. Highest snakebite prevalence was recorded for males in  
42 the age group 15-44 years during farming activities, with most bites occurring in the leg/foot region.

43 Highest snakebite rate was within farmlands, most frequently caused by the Carpet viper (*Echis*  
44 *ocellatus*).

45

## 46 **Conclusion**

47 The relatively high community-based prevalence rate of ~6%, and fatality rate of ~3%, indicate that  
48 snakebites represent an important public health risk in northern Ghana. Based on the high number of  
49 respondents and long recording period, we believe these data truly reflect the general situation in  
50 rural Ghana and West Africa at large. We recommend increased efforts from both local and  
51 international health authorities to address the current snakebite health crisis generally compromising  
52 livelihoods and productivity of rural farming communities in West Africa.

53 **Keywords:** Serpentes, envenomation incidence, demography, Guinea savannah, West Africa

54

## 55 **AUTHOR SUMMARY**

56 Snakebite envenomations cause tens of thousands of deaths and hundred thousands of injuries in  
57 many developing tropical countries each year, and sub-Saharan Africa represents an epitome of this  
58 ‘neglected tropical disease’. We present data spanning 10 years (1999-2008) which was collected  
59 over a six-month period, by applying different methodologies across a typical rural savanna  
60 community of northern Ghana. Our data corroborate previous findings from the region that  
61 snakebites constitute a serious public health threat, and that young and active farmers are  
62 particularly at risk, hence compromising both livelihoods and economic wealth of the people. We  
63 highlight that many interrelated factors involving both snake ecology and human behaviour in  
64 particular, are responsible for the high snakebite prevalence recorded. We conclude that our findings  
65 support increased and concerted efforts by both local authorities and state institutions to address the  
66 ongoing African snakebite crisis. Such interventions require the generation of more general baseline

67 data on snake ecology and human behaviour, combined with education and information through  
68 public awareness campaigns. To achieve this, we recommend community-based stakeholder  
69 meetings involving the local people, traditional authorities, and public institutions working to  
70 address the persistent snakebite menace in this part of the world.

71

## 72 **INTRODUCTION**

73 Snakebite envenomations constitute one of the most important human-wildlife conflicts, causing  
74 considerable yet largely insufficiently known magnitudes of socio-economical losses, morbidity and  
75 death [1]. Globally, out of >3,500 snake species, ~600 are venomous, and ~280 are considered  
76 medically important, causing a conservatively estimated >1.2 million snakebite envenomations  
77 causing ~100,000 deaths and >400,000 cases of morbidity annually [1, 2, 3, 4]. Prevailing  
78 conservative estimates of the global burden of snakebite envenomations and fatalities are probably  
79 highly underrated as majority are based on conventional health facility reports, largely neglecting  
80 cases treated by local traditional medical practitioners (TMPs) [1, 5, 6]. Perhaps more realistic  
81 annual estimates indicate between 4.5-5.4 million snakebites, 1.8-2.7 million envenomations and up  
82 to 138,000 deaths [6, 7]. Snakebite envenomation is largely a disease of poverty, with developing  
83 countries in the tropics recording the highest rates of incidence, morbidity and mortality [4, 8, 9].  
84 People engaged in farming, hunting, fishing and other rural activities are at highest risk, mostly  
85 bitten on their limbs during work [9, 10]. In many parts of sub-Saharan Africa, the high mortality  
86 and morbidity rates are attributed to increased vulnerability caused by both high work risk and  
87 exposure to diverse snake habitats, as well as poor infrastructure and limited access to appropriate  
88 medical treatment and health facilities [1, 4, 6]. Currently, an estimated ~100 million people,  
89 particularly in southeast Asia and Africa, live in vulnerable areas with very high exposure to snake  
90 envenomation and lack of effective antivenom therapy [4]. The current ‘global snakebite crisis’ as a

91 disease of poverty, has been termed misunderstood, underrated, ignored or neglected as a public  
92 health issue [5, 8, 11, 12], and has lately gained prominence as one of the most important ‘neglected  
93 tropical diseases’ [7].

94

95 In order to mitigate the inadequate health care and treatment of victims of snakebite envenomations,  
96 concerted international effort is essential to gather steady and inclusive data on the epidemiological  
97 nature of snakebites with socio-demographic and geographic dimensions as well as aspects of snake  
98 biology and ecology [4, 5, 12, 13]. Mapping of comprehensive datasets is imperative for  
99 understanding the dynamics of human-wildlife conflict such as snakebite vulnerability, and  
100 constitute the baseline information needed to provide adequate health facilities and supply of  
101 antivenom and other therapeutical innovations [1, 2, 6, 14]. However, inclusive community-based  
102 information is currently limited from many high-risk areas particularly in sub-Saharan Africa [15,  
103 16]. There is therefore the need for detailed information from studies combining both field and  
104 hospital data [4, 6, 9]. Here, we present a comprehensive and complementary epidemiological  
105 dataset of snakebite envenomations from northern Ghana, comprising both household and TMP  
106 surveys as well as retrospective hospital reports covering the period 1999-2009. Apart from  
107 contributing baseline epidemiological snakebite data, our survey, conducted by snake ecologists,  
108 also targeted human-wildlife conflict dynamics, with the purpose of providing insight into measures  
109 for improved snakebite prevention and facilitation of effective therapeutic methods. We note that the  
110 vast majority of snakebite studies are undertaken solely by medical officers, and as such mainly  
111 focused on clinical-pharmaceutical, socio-demographic and epidemiological aspects, with much less  
112 attention to biology and ecology of humans as well as snakes. An additional objective of this paper  
113 was to apply an integrative approach involving snake ecology and common snakebite epidemiology,  
114 in order to increase our understanding of the complex human-wildlife conflict that snakebites truly

115 represent. We consider that such holistic research foci are vital and urgently required by  
116 international funding agencies and national public health institutions in their joint efforts to address  
117 the ongoing global snakebite crisis [2, 4, 7, 10, 12, 13].

118

## 119 **METHODS**

### 120 **Study area**

121 The Savelugu-Nanton District, covering ~2023 km<sup>2</sup>, is located in the Northern Region of Ghana. It  
122 is bordered by five other districts (Fig. 1), notably West Mamprusi (north), Karaga (east), Tolon-  
123 Kumbungu, and Tamale Metropolitan Area (west) and Yendi (south). Based on a 2010-population  
124 census count of 139,283 (female/male %-ratio = 51.5/48.5) and an annual growth rate of about 2.5%  
125 for northern Ghana [17], we estimated the total population of the district as ~130,000 in 2008,  
126 translating to a mean density of ~64 persons km<sup>-2</sup>. The district falls within the Guinea Savanna  
127 vegetation zone of northern Ghana, with a single-peak, erratic rainfall pattern, increasing rapidly  
128 from April to peak in August-September, then sharply decreasing during October, and ranging  
129 between ~600 to ~1,000 mm annually on average [18]. Mean daily temperatures are usually high,  
130 averaging 34 °C, with maximum of >42 °C and minimum of <15 °C [18]. Retrospective monthly  
131 rainfall data during 1999-2008 was obtained from the Ghana Meteorological Authority in Tamale.  
132 The sparsely-populated northern parts of the district have denser vegetation, mostly with  
133 regenerating woodlands, compared with the more urbanized south around the Tamale Metropolis  
134 characterised by more intensive farming, bush burning and tree felling for charcoal production.  
135 Many woodland tree species are drought-resistant and foliage is largely retained during the  
136 prolonged dry season (November-March).

137

138 **Data collection**

139 We conducted a cross-sectional respondent study between December 2008 and May 2009 in the  
140 seven most populated communities (= study sites) in the district (Fig. 1), including 1,000 community  
141 residents and 24 TMPs operating in these communities. Both residents and TMPs were subjected to  
142 detailed, independently administered, semi-structured questionnaires. Prior informed consent (PIC)  
143 was obtained from traditional leaders and authorities in each community after explanation of the  
144 scope, purpose and procedure of the study [19]. Such independent administration of interview  
145 protocols and PIC enhance the reliability and inclusiveness of respondent information and hence  
146 both the quantity and quality of informant data [20, 21]. The selection of residents was stratified  
147 randomly across three age groups, each with gender equality; >30 years (400); 15-30 years (300);  
148 <15 years (300). The number of residents sampled from each of the seven study sites reflected  
149 community size and were; Savelugu (200), Diarre and Pong-Tamale (150 each), Nanton, Zoggu,  
150 Moglaa and Tampion (125 each). Within each of the seven communities, respondents were  
151 randomly selected among households, inclusively conforming to the gender-age stratification  
152 criteria. The 24 TMPs were selected opportunistically using ‘Snowball sampling’ [19].  
153 Complementing the community-based data collection was a retrospective study of reported cases of  
154 snakebites over a 10-year period (1999-2008) that were obtained from the Savelugu District  
155 Hospital, the largest district hospital managing snakebite victims. Patient data was analysed  
156 anonymously, after obtaining formal approval from the Savelugu District Hospital authorities.

157

158 **Data analysis**

159 Informant data obtained from questionnaires were analysed using Microsoft Excel™ and  
160 GraphPad™ version 5.01. Frequencies of occurrence (%) in each respondent category were  
161 compared among different sub-groups, and associations tested for statistical differences with

162 Fisher's exact test for 2×2 contingency tables (two sub-groups compared) or  $\chi^2$  G-test for three or  
163 more sub-groups compared (2×3 contingency tables). Associations between rainfall and snakebite  
164 incidences were determined using both GLM and polynomial regression with Pearson's ( $r$ ) or  
165 Spearman rank ( $r_s$ ) correlation coefficients. Significance level was determined at  $p < 0.05$ .

166

## 167 RESULTS

### 168 Household survey

#### 169 *Educational level of respondents*

170 Majority (518) of 1,000 respondents (~52%) had no formal education whereas ~44% had only basic  
171 primary education (7-9 years of schooling). Only ~4% had additional secondary education (10-12  
172 years), with <0.5% having tertiary education (>12 years) only (Table 1). Hence, respondents were  
173 primarily made up of either illiterates or people with modest schooling.

174

175 **Table 1** Basic socio-demographic characteristics and snake-conflict encounter statistics of the  
176 respondent community population (n = 1,000 residents) comprising seven communities surveyed in  
177 the Savelugu-Nanton District of northern Ghana (Dec 2008-May 2009).

178

| Respondent variable                          | No. of respondents (%) |
|----------------------------------------------|------------------------|
| Males                                        | 500 (50.0)             |
| Females                                      | 500 (50.0)             |
| <15 years old                                | 300 (30.0)             |
| 15-30 years old                              | 300 (30.0)             |
| >30 years old                                | 400 (40.0)             |
| No formal education (illiteracy)             | 518 (51.8)             |
| Basic primary school level (7-9 yrs)         | 439 (43.9)             |
| Secondary school level (10-12 yrs)           | 39 (3.9)               |
| Tertiary educational level (> 12 yrs)        | 4 (0.4)                |
| Experienced a snake-conflict encounter       | 934 (93.4)             |
| Experienced a snakebite personally (E)       | 58 (5.8)               |
| Witnessed a snakebite in their community (W) | 799 (79.9)             |
| Total snakebite incidences reported (E+W)    | 857 (85.7)             |

179



181 ***Snakebite prevalence: comparing gender and age of victims***

182 Considerably more males (~62%) than females (~38%) were reportedly bitten by snakes (n = 58  
183 cases), although the difference was not statistically significant (Fisher's exact test; p = 0.0778, df =  
184 1), at the 5% level (Table 2). With regards to age, significantly ( $\chi^2 = 14.616$ ; p = 0.00067, df = 2)  
185 more victims were in the age group >30 years (~64%), whereas the group of 15-30 years (~17%)  
186 and <15 years (~19%) were similar in prevalence to snakebites (Table 2).

187

188 **Table 2** Associations of reported personal snakebite incidences (n = 58) with gender and age-  
189 group of 1,000 community members (male/female = 500 each) interviewed in the  
190 Savelugu-Nanton District of northern Ghana (Dec 2008-May 2009).

191

| Variable | Sub-group variable | Frequency (%) | Test-statistics                | p-value |
|----------|--------------------|---------------|--------------------------------|---------|
| Gender   | Male               | 36 (62.1)     | Fisher's exact test (2×2)      | 0.0778  |
|          | Female             | 22 (37.9)     |                                |         |
| Age      | <15 years          | 11 (19.0)     | $\chi^2$ G-test (2×3) = 14.616 | 0.00067 |
|          | 15-30 years        | 10 (17.2)     |                                |         |
|          | >30 years          | 37 (63.8)     |                                |         |

192

193

194 ***Personal encounters, interactions and snakebites***

195 As many as 934 (~93%) respondents had encountered snakes during their lifetime and hence been  
196 exposed to considerable risk of snakebites, and 58 respondents (~6%) claimed to have been bitten by  
197 snakes, irrespective of actual envenomation or hospitalisation (Table 1). Of the 934 snake  
198 encounters (Table 3) majority encountered snakes on their farms (604; ~65%), but also in the bush  
199 (~16%) or in their homes (~11%). Considerably lower encounter frequencies were attributed to  
200 roads and footpaths (~6%), school facilities (~2%) and open urban drains (<1%). Snake encounters  
201 were predominant during afternoon (~50%) and morning (~40%) hours, particularly during the rainy  
202 season, accounting for ~72% of yearly records by respondents (Table 3).

203

204 **Table 3** Characteristics of personal snake-conflict encounters reported (n = 934 incidences)  
 205 among 1,000 community members interviewed in the Savelugu-Nanton District of  
 206 northern Ghana (Dec 2008-May 2009).  
 207

| <b>Respondent variable</b>      | <b>Sub-group variable</b> | <b>Encounters (%)</b> |
|---------------------------------|---------------------------|-----------------------|
| Encountering habitat location   | Farmlands                 | 604 (64.7)            |
|                                 | Bushes                    | 145 (15.5)            |
|                                 | House and yards           | 100 (10.7)            |
|                                 | Paths and roads           | 60 (6.4)              |
|                                 | School facilities         | 19 (2.0)              |
|                                 | Open city drains          | 6 (0.6)               |
| Encountering time of the day    | Afternoon                 | 471 (50.5)            |
|                                 | Morning                   | 372 (39.8)            |
|                                 | Evening and night         | 91 (9.7)              |
| Encountering season of the year | Rainy season              | 669 (71.6)            |
|                                 | Dry season                | 265 (28.4)            |

208

209 ***Knowledge, awareness and perception of other snakebite victims***

210 A total of 604 (~60%) respondents provided knowledge about 799 snakebite cases from their  
 211 respective communities in total (Table 4). Thus, the total recorded cases of snakebites, including  
 212 personal experiences (n = 58) was 857, with a total of 24 (~2.8%) reported deaths (Table 1, 5).

213 **Table 4** Snakebite cases reported by each of 604 respondents out of 1,000 community members  
 214 interviewed in the Savelugu-Nanton District of northern Ghana (Dec 2008-May 2009).  
 215

| <b>Cases</b> | <b>Respondents</b> | <b>Total</b> |
|--------------|--------------------|--------------|
| One          | 449                | 449          |
| Two          | 121                | 242          |
| Three        | 30                 | 90           |
| Four         | 3                  | 12           |
| Six          | 1                  | 6            |
| <b>Total</b> | <b>604</b>         | <b>799</b>   |

216

217 Of the 857 snakebite cases, majority (~70%) of victims were males, predominantly in the 15-30  
 218 years (~54%) and >30 years (~35%) age groups. Farmlands were the most frequently reported  
 219 locations (~81.0%) for snakebite, primarily during the rainy season (~71%), in the mornings (~40%)  
 220 and afternoons (~38%) (Table 5). Snakebites occurred mainly on the extremities, with lower limbs  
 221 (legs and feet; ~65%) and upper limbs (arms and hands; ~34%) being the most vulnerable. Swelling  
 222 (~53%) and bleeding (~39 %) were the commonest symptoms reported (Table 5).

223 **Table 5** Comparison of perceptual characteristics of snakebite victims and incidences based on  
 224 household surveys (\*n<sub>max</sub> = 857 cases) and traditional medical practitioners (TMP; \*\*n =  
 225 24 respondents; \*\*\*n = 42 and 65 cases), respectively among 1,000 community members  
 226 and 24 TMPs, interviewed in the Savelugu-Nanton District of northern Ghana (Dec  
 227 2008-May 2009).  
 228

| Respondent variable<br>(n = responses)                   | Sub-group variable                  | Survey frequency (%) |           |
|----------------------------------------------------------|-------------------------------------|----------------------|-----------|
|                                                          |                                     | Household            | TMP       |
| Gender<br>(*n = 833; **n = 24)                           | Male                                | 584 (70.1)           | 22 (91.7) |
|                                                          | Female                              | 249 (29.9)           | 2 (8.3)   |
| Age-group of victim<br>(*n = 412; **n = 24)              | 15-30 years                         | 222 (53.9)           | 13 (54.2) |
|                                                          | >30 years                           | 146 (35.4)           | 10 (41.6) |
|                                                          | <15 years                           | 44 (10.7)            | 1 (4.2)   |
| Day time hours of snakebite<br>(*n = 828; **n = 24)      | Morning                             | 334 (40.3)           | 11 (45.8) |
|                                                          | Afternoon                           | 315 (38.0)           | 10 (41.7) |
|                                                          | Evening and night                   | 179 (21.6)           | 3 (12.5)  |
| Season of snakebite<br>(*n = 857; **n = 24)              | Rainy season                        | 610 (71.2)           | 20 (83.3) |
|                                                          | Dry season                          | 247 (28.8)           | 4 (16.7)  |
| Habitat location of snakebite<br>(*n = 670; **n = 24)    | Farmlands                           | 543 (81.0)           | 16 (66.6) |
|                                                          | Bushes                              | 56 (8.4)             | 7 (29.2)  |
|                                                          | House and yards                     | 54 (8.1)             | -         |
|                                                          | Paths and roads                     | 5 (0.7)              | 1 (4.2)   |
|                                                          | School facilities                   | 9 (1.3)              | -         |
| Position of snakebite infliction<br>(*n = 828; **n = 24) | Open city drains                    | 3 (0.5)              | -         |
|                                                          | Legs and feet                       | 540 (65.2)           | 19 (79.2) |
|                                                          | Arms and hands                      | 280 (33.8)           | 5 (20.8)  |
|                                                          | Head                                | 7 (0.8)              | -         |
|                                                          | Trunk                               | 1 (0.1)              | -         |
| Symptoms most often reported<br>(*n = 821; ***n = 42)    | Swelling                            | 431 (52.5)           | 14 (33.3) |
|                                                          | Bleeding                            | 320 (38.9)           | 20 (47.6) |
|                                                          | Local pain                          | 67 (8.2)             | -         |
|                                                          | Dizziness                           | 3 (0.4)              | -         |
|                                                          | Blood spitting                      | -                    | 4 (9.5)   |
|                                                          | Sweating                            | -                    | 2 (4.8)   |
|                                                          | Shivering                           | -                    | 2 (4.8)   |
| Likely causal snake species<br>(***n = 65)               | Carpet Viper                        | n/a                  | 23 (35.4) |
|                                                          | Night Adder                         | n/a                  | 17 (26.2) |
|                                                          | Black-necked Spitting Cobra         | n/a                  | 13 (20.0) |
|                                                          | Puff Adder/other <i>Bitis</i> sp.   | n/a                  | 8 (12.2)  |
|                                                          | Grass snakes/ <i>Psammophis</i> sp. | n/a                  | 4 (6.2)   |

229  
 230 \*Household survey: For cases where total responses n<sub>tot</sub> < 857, are explained by failure of respondents to  
 231 recall details.

233 **Traditional medical practitioner survey**

234 *Knowledge and perception of snakebite victims and snake culprits*

235 The 24 TMPs reported that majority of patients were males (~92%), in the age groups >30 years  
 236 (~54%) and 15-30 years (~42%), most often bitten on farmlands (~67%) and bushes (~29%), during  
 237 the rainy season (~83%), in the mornings (~46%) and afternoons (~42%) hours (Table 5).  
 238 According to the TMPs, most vulnerable are legs and feet (~79%), followed by the arms and hands  
 239 (~21%), with bleeding (~48%) and swelling (~33%) as most frequently reported symptoms (Table  
 240 5). The general snake descriptions provided by the TMPs indicated that three snake species were  
 241 most likely involved in ~81% of all cases reported; Carpet Viper *Echis ocellatus* (~35%), Night  
 242 Adder *Causus maculatus* (~26%), and Black-necked Spitting Cobra *Naja nigricollis* (~20%).

243

244 **Hospital survey**

245 *Snakebite prevalence: comparing gender and age of victims*

246 Based on the 10-year (1999-2008) retrospective records of snakebite cases (n = 450) at the main  
 247 district hospital, significantly more males, particularly in the 15-44 years age group ( $\chi^2$  G-test =  
 248 29.56, p < 0.00001, df = 2), were bitten than females, as well as males in the <15 years and >44  
 249 years age groups (Table 6).

250 **Table 6** Statistically-tested associations of snakebite cases (n = 450) with gender and age-group  
 251 reported at the Savelugu-Nanton District Hospital in northern Ghana (1999-2008).  
 252

| Sub-group variable                                                   | Gender     |             | Total (%)   |
|----------------------------------------------------------------------|------------|-------------|-------------|
|                                                                      | Males (%)  | Females (%) |             |
| Age group (years)                                                    |            |             |             |
| <15                                                                  | 90 (20.0)  | 12 (2.7)    | 102 (22.7)  |
| 15-44                                                                | 133 (29.6) | 91 (20.2)   | 224 (49.8)  |
| >44                                                                  | 73 (16.2)  | 51 (11.3)   | 124 (27.5)  |
| Total                                                                | 296 (65.8) | 154 (34.2)  | 450 (100.0) |
| Statistical Test: $\chi^2$ G-test (2×3) = 29.56, p < 0.00001, df = 2 |            |             |             |

253

254

255 Across all three age groups, males dominated in number of reported cases, whereas the females  
256 constituted relatively fewer cases in the youngest age group (2.7%) but 4-8 times more in the two  
257 older groups (Table 6). For both males and females, the 15-44 years group dominated in almost 50%  
258 of all cases reported. These results are largely consistent with age-gender trends of personal  
259 snakebite cases (n = 58) reported among 1,000 respondents in the 2008-2009 household survey, with  
260 dominance of males across all age groups, and in particular for the >30 years age group (Table 2). In  
261 summary, the most and least vulnerable to snakebites were young to middle aged men and younger  
262 girls respectively.

263

#### 264 ***Correlations between rainfall and snakebites for the period 1999-2008***

265 By comparing concurrent data sets of mean monthly rainfall with monthly records of snakebites  
266 reported to the district hospital in 1999-2008 (Fig. 2), we were able to evaluate the perception  
267 reported among community members that snakebites were more prevalent during the rainy season  
268 (Table 3, 5). The 10-year plot of rainfall-snakebite monthly means depicts a clear unimodal rainfall  
269 curve with a single peak from July to September, whereas snakebite incidences display a trimodal  
270 pattern with peaks in March, June-July and October (Fig. 2). Hence, the largely overlapping rainfall-  
271 snakebite trend demonstrates a positive association between rainfall and snakebite frequency, in line  
272 with respondent (both victims and TMPs) perceptions (Table 3, 5). We tested this apparent positive  
273 association by plotting 10-years pair-wise data of mean monthly rainfall with mean monthly  
274 snakebite cases, and found a weak statistically significant ( $r_s = 0.587$ ,  $p = 0.0446$ , two-tailed,  $n = 12$ )  
275 positive linear correlation between the two variables (Fig. 3). However, the correlation for GLM-  
276 regression using Pearson's correlation coefficient was not significant ( $r = 0.521$ ,  $p = 0.0822$ , two-  
277 tailed,  $n = 12$ ). We also performed a 2<sup>nd</sup> degree polynomial regression which showed a higher level  
278 of significance ( $r = 0.652$ ,  $p = 0.022$ , two-tailed,  $n = 12$ ) compared with the GLM-regression,

279 thereby indicating a hump-shaped association pattern (Fig. 3). Thus, although snakebite rates are  
280 generally linked to rainfall levels, extreme amounts of rain appear to reduce this positive correlation.

281

## 282 **DISCUSSION**

283 Our study applied an extensive set of complementary epidemiological data from different  
284 community sectors, by targeting various demographic sub-groups as well as both traditional and  
285 non-traditional management of snake envenomations at the district level. With a large sample size of  
286 1,024 respondents covering both dry and wet seasons, and a retrospective 10-year bivariate data  
287 sample of snakebite incidences and rainfall patterns, our study represents an important contribution  
288 to epidemiological snakebite studies for this region. Previous epidemiological studies have largely  
289 been limited to short-term data series with lower sample sizes of predominantly retrospective  
290 hospital records for Ghana [22, 23, 24] and sub-Saharan Africa [25, 26, 27, 28, 29], where  
291 complementary or nationwide long-term published studies remain scarce [1, 16, 30, 31]. Estimates  
292 of regional or national snakebite burdens based exclusively on hospital records inevitably neglect  
293 many snakebite cases treated at home or by TMPs [1, 4, 16, 30]. In contrast, our study provided a  
294 rare opportunity to test consistencies in epidemiological baseline information gathered from  
295 different sections of a typical rural savanna community in West Africa [16], regarding general  
296 demography and human-snake conflict, as well as snake toxicology and ecology. In order to  
297 enhance advances in public health capacity to address snakebite envenomation, it is important to  
298 provide inclusive and holistic evaluations of implicating factors across the whole community and  
299 over long periods of time, including ecological aspects [2, 4, 7, 30]. Specifically, it is important to  
300 ask where, when and why snakebites occur, and to identify and evaluate pertinent factors that  
301 preclude or facilitate their occurrence, treatment and prevention [1, 4, 10, 12].

302 Our study confirms the general assertion that snake envenomations leading to significant levels of  
303 morbidity and mortality are symptomatic of rural deprivation and poverty in sub-Saharan Africa,  
304 where educational levels are pronouncedly low within farming communities subject to limited  
305 infrastructure and mobility [4, 8, 9, 12]. Our respondents were primarily made up of either illiterates  
306 or people with modest schooling, a demographic feature characteristic of the mostly deprived rural  
307 areas of northern Ghana, and a tendency particularly pronounced among women and the elderly. We  
308 located 24 TMPs in seven randomly-chosen communities, demonstrating that the TMP-inhabitant  
309 ratio of at least 1:5,000 ( $\sim 24/130,000$ ) is  $\sim 10$  times lower than the regional doctor-patient ratio for  
310 northern Ghana in 2009 [32]. As the Savelugu-Nanton District road network was fairly well  
311 developed during our study, we attribute the high patronage of TMPs mainly to low educational  
312 level and income, limited access to orthodox medical facilities as well as high costs or lack of  
313 sufficient and effective antivenom administration. This TMP-seeking behaviour is widespread in  
314 Asia [33] and Africa [16, 34, 35, 36] where herbal extracts of diverse medicinal plant assemblages  
315 [37] are often either culturally preferred or are the only affordable or alternative therapeutic  
316 treatment available among low-income rural communities with high levels of illiteracy and strong  
317 belief in the supernatural [16, 19, 38, 39, 40, 41].

318  
319 Based on the 1,000-respondent household survey, we conservatively estimated a snakebite  
320 prevalence of  $\sim 6\%$ , and a mortality rate of  $\sim 3\%$ , translating to respectively  $\sim 7,500$  snakebite  
321 incidences and  $\sim 200$  deaths at the district level, for a total district population estimated at  $\sim 130,000$   
322 in 2008. We recognise that our incidence and mortality data are based on unknown recollection  
323 periods of each informant, and we can therefore not explicitly translate these district level figures  
324 into annual snakebite and mortality rates. However, assuming a recollection period of  $\sim 10$  years  
325 retrospectively for an average respondent, the estimated annual snakebite cases and fatalities at

326 district level may probably reach ~750 and ~20 respectively. A longer average respondent  
327 recollection period is unlikely as both young and old respondents exhibited limited memory beyond  
328 10 years. Moreover, if such a period was ~5 years, it would translate to a double of cases and  
329 fatalities, which likewise appears unlikely. The mean monthly number of cases reported to the  
330 largest district hospital was 3.9 over the 10-year period (1999-2008), which equals an average of  
331 46.6 cases yearly (Fig. 2). Based on hospital records, the whole district therefore probably has a  
332 burden of at least 50 reported cases yearly, and probably as much as double if the reporting  
333 percentage is up to 50% as estimated in similar studies [12, 16, 41]. Our upper-lower limits of  
334 annual snakebite envenomations during the 10-year period therefore range from 100-750, equivalent  
335 to 75-575 per 100,000 inhabitants, with a mortality rate of 2-17 per 100,000. The population of  
336 Savelugu-Nanton District was ~130,000, constituting ~6% of the population of the Northern Region  
337 of Ghana in 2008 [17], so we conservatively estimate about 1,700-12,500 envenomations with about  
338 50-350 fatalities annually (mortality rate of ~3%) in this part of the country. This figure makes up  
339 about 20-95% of a Ghana national estimate of about 250-375 [40], and is within the range of current  
340 available estimates for the sub-region [1, 9] and other estimates from northern [23] and central [22,  
341 42] Ghana, but 5-10 times higher than southwest Ghana [24].

342  
343 The human deprivation, psychosocial despair, and loss of income resulting from snakebite morbidity  
344 and mortality [7, 35, 40], are clearly demonstrated by our complementary data from the northern  
345 part of the savanna zone in Ghana, where annual snakebite burdens are the most severe across the  
346 entire country. Our data also indicate that the vast majority of snakebites are never reported to  
347 conventional medical treatment facilities but managed by TMPs, home treatment or are untreated,  
348 sometimes with fatal consequences [16, 24, 43]. Long delays in antivenom treatment often lead to  
349 severe cases of morbidity (e.g. amputations) or death, even if such treatment is administered



350 correctly [22, 42, 44, 45]. It is therefore important to ascertain the extent of both untreated and  
351 delayed treatments in order to address these clinical and epidemiological shortcomings in the  
352 management of snakebites in remote rural parts of Ghana and sub-Saharan Africa [2, 13, 15, 40, 42].  
353 We hope our snakebite data analyses from the Savelugu-Nanton District, a typical northern savanna  
354 community in Ghana, will aid in this direction.

355  
356 We consistently found that young to middle-aged men (age group = 15-44 years) were most at risk  
357 of snakebites, corroborating similar findings from Ghana [22, 23, 24], other parts of West Africa  
358 [15, 25, 26, 27, 44, 46, 47] and Africa in general [30, 34, 48, 49, 50]. Adolescent and young men in  
359 their twenties are among the most active and adventurous, albeit least cautious, section of rural  
360 African people [24, 27, 44, 51]. They expose themselves to snake encounters by risky behaviour  
361 during land clearing, harvesting, bush and charcoal burning, hunting and commuting on foot during  
362 dark or early morning hours with impaired visibility in dim light and dense vegetation [24, 47, 50].  
363 Minors and the elderly who are traditionally home-bound, are less involved in farming activity, and  
364 are generally more cautious in their behaviour, which possibly explains their much lower snakebite  
365 vulnerability [31]. Some girls and the elderly were however bitten at home or in school facilities,  
366 indicating that everyone is at risk of snakebites [7, 24, 31, 43, 51, 52]. Contrary to our findings,  
367 some studies in Africa actually report relatively higher snakebite prevalence in children, including  
368 girls, probably as a result of higher child-labour engagement or poorer parental care and supervision  
369 in such areas [23, 31, 50, 51, 53, 54, 55, 56].

370  
371 Our data from all three respondent groups indicated that farmlands and bushes, and to a lesser  
372 extent, residential areas and roads are typical habitats for snakebite, as corroborated by several other  
373 studies in rural Africa [16, 31, 38, 50, 51]. Likewise, majority of bites occur during the peak farming

374 periods (e.g. shea nut, millet and yam) when land is prepared for planting (March-April), maintained  
375 by weeding (May-June), and harvested (June-October) [23, 47, 51]. Our long-term bivariate rainfall-  
376 snakebite data indirectly reflect the strong link between peak seasons of farming and rainfall, partly  
377 because artificial water sources are largely unavailable to the small-scale peasant farmer in northern  
378 Ghana and other parts of arid savanna zones in Africa. However, even though rainfall and snakebites  
379 are generally positively-correlated, our data also suggest that very intense rainfall reverses the trend,  
380 possibly caused by decreased activity of both snakes and humans as well as lower snakebite  
381 reporting rates due to the reduced mobility from flooding and erosion of basic road infrastructure.  
382 Although the dry season recorded lower snakebite rates, farmers are also at risk during this period,  
383 often being bitten during bush or charcoal burning, hunting, harvesting firewood, and at home  
384 during reduced farming activity in November-April [22, 47, 50].

385  
386 As agricultural mechanisation is particularly low in northern Ghana, predominantly manual  
387 activities using the limbs expose farmers to snakes concealed in vegetation, soil and crops. This may  
388 explain why those extremities are the most prone to snakebites [23, 44, 47, 51]. Farming activities  
389 primarily take place during morning or late afternoon in order to avoid excessive sun exposure and  
390 heat during midday. Such factors also result in the poikilothermic snakes seeking warm areas during  
391 morning hours and shade in the hot midday and early afternoons. Nocturnal snakebites were mostly  
392 confined to homes and roads, a pattern found in many other rural areas of Africa, and attributed to  
393 walking barefoot, or inappropriate footwear and poor domestic lighting conditions [25, 31, 45, 51].

394  
395 Snakebite prevalence, risk and rates are determined by several interrelated factors pertaining to both  
396 snakes and humans, notably the density, activity and behaviour of the snake culprits and their  
397 victims. Snake density appears the most important factor, as the commonest species are also often

398 the most prevalent as culprits [23, 46]. Snake density is related to habitat type and human  
399 disturbance, as well as food sources and hiding places. It is also inversely related to human density  
400 in many parts of sub-Saharan Africa [27, 30, 46], and therefore directly related to both destruction of  
401 suitable habitats as well as human persecution, especially in most African cultures with great dislike  
402 of snakes. Snakebite prevalence is lower in urban centres devoid of natural vegetation, and where  
403 snakes are at higher risk of being detected and killed [30]. Our data were in line with this inverse  
404 human-snake density-relationship, as evidenced by lower bite rates closer to Tamale, the district  
405 capital with >300,000 inhabitants.

406  
407 Apart from densities of both humans and snakes, activity patterns and behaviour are two other  
408 important factors highly correlated with habitats, daytime hours and season. During rains, in which  
409 farming activities peak in the savanna zone, snakes often synchronise their breeding periods with  
410 high prey abundances [57, 58]. Likewise, density and activity of prey such as amphibians, birds,  
411 lizards, murid rodents and other snakes increase during rains, due to prey availability (mainly  
412 invertebrates) increasing along with the flourishing vegetation. The number of active farmers,  
413 combined with actively-hunting and breeding snakes tends to increase human-snake encounters,  
414 often resulting in bites and envenomations [46]. Similarly, the density-activity influence on human-  
415 snake encounters and the behaviour of the snake culprits as well as victims are important factors.  
416 Risky behaviour during farming, hunting and firewood collection (e.g. using unprotected limbs to  
417 grasp, cut, dig, lift and pick tools, foods and other important farm-related items), increases the  
418 probability of unintendedly provoking and even attacking snakes [31, 51]. In response, the disturbed  
419 snakes may vigorously defend themselves either by hissing, inflating hoods, whipping tails, venom  
420 spitting or biting. Certain species appear more docile and reluctant to strike even if trodden on (e.g.  
421 Gaboon Viper *Bitis gabonica* and Phillips Grass Snake *Psammodon phillipsi*) while others tend to

422 be extremely aggressive and prone to strike at the least provocation or threat (e.g. Black-necked  
423 Spitting Cobra *Naja nigricollis* and Carpet Viper *Echis ocellatus*). Some species retreat long before  
424 humans are even close, whereas others stay put and motionless until it is too late to detect their  
425 presence before they strike. Highly mobile species may enter houses, garages and even cars in  
426 search of prey or warm places (e.g. cobras and small vipers), while other slow-moving species (e.g.  
427 large vipers) avoid such human-trafficked areas which pose great human-detection risks. As in the  
428 majority of West African studies, and as recorded from all sections of our study population, three  
429 snake species were by far the commonest snakebite culprits; Carpet Viper, Night Adder *Causus*  
430 *maculatus* and Black-necked Spitting Cobra [16, 23, 26, 35, 40, 43, 45, 46]. These three species  
431 were also the commonest found in our study area, as shown by extensive ecological censuses [59].  
432 Polyvalent antivenom of these species in particular, is therefore essential in this part of northern  
433 Ghana [22, 23, 42].

434

## 435 **CONCLUSION**

436 Our community-based complementary data clearly demonstrate the gravity of snakebite  
437 envenomations in the savanna zone of northern Ghana, and the relatively high burden of incidence,  
438 morbidity and mortality. These findings cannot be overemphasised with respect to their negative  
439 implications for public health, agricultural productivity, social welfare and economic growth. In  
440 order to address the shortcomings of adequately-trained personnel, effective treatment with  
441 antivenom, and other efficient therapy, we recommend concerted efforts from both conventional and  
442 traditional medical practitioners to monitor, map and analyse snakebite incidences at district levels,  
443 including scientific efficacy testing of complementary therapy to expensive and unavailable  
444 polyvalent antivenoms. Additionally, community members, particularly the youth, should be  
445 sensitised on risky snakebite behaviour, snake biology and measures to prevent and minimise the

446 likelihood of snakebites. Such interventions could be achieved through community meetings,  
447 education and awareness sessions, and steady contact in the field with public health authorities  
448 liaising with traditional rulers and TMPs.

449

## 450 **ACKNOWLEDGEMENTS**

451 We would first like to thank the local communities that participated in the survey, notably the elders,  
452 traditional rulers and medicinal practitioners, as well as staff at the Savelugu District Hospital and  
453 the Meteorological Survey Department in Accra. Special appreciation goes to Mohammed Mukhtar,  
454 Imoro Abdul Rashid, Issah Shaban, Abubakari Abdul Fatawu and Yakubu Abdul Latif.

455

## 456 **FUNDING**

457 Our research was not supported by any public, commercial or non-profit funding agencies.

458

## 459 **CONFLICT OF INTEREST**

460 None.

461

## 462 **REFERENCES**

- 463 1. Kasturiratne A, Wickremasinghe AR, De Silva N, Gunawardena NK, Pathmeswaran A,  
464 Premaratna R, Savioli L, Lalloo, DG., de Silva, HJ. The global burden of snakebite: A literature  
465 analysis and modelling based on regional estimates of envenoming and deaths. PLoS Medicine.  
466 2008; 5(11):1591–604.
- 467 2. Gutiérrez JM, Warrell DA, Williams DJ, Jensen S, Brown N, Calvete JJ, Harrison RA (2013)  
468 The need for full integration of snakebite envenoming within a global strategy to combat the

- 469 neglected tropical diseases: The way forward. *PLoS Neg. Trop. Dis.* 7(6): e2162.  
470 doi:10.1371/journal.pntd.0002162
- 471 3. Figueroa A, McKelvy AD, Grismer LL, Bell CD, Lailvaux SP (2016) A species-level phylogeny  
472 of extant snakes with description of a new colubrid subfamily and genus. *PLoS ONE* 11(9):  
473 e0161070. doi:10.1371/journal.pone.0161070.
- 474 4. Longbottom J, Shearer FM, Devine M, Alcoba G, Chappuis F, Weiss DJ, Ray SE, Ray N,  
475 Warrell D, de Castañeda RR, Williams DJ, Hay SI, Pigott DM (2018) Vulnerability to snakebite  
476 envenoming: a global mapping of hotspots. *The Lancet* 392: 673-684. Published online at  
477 [http://dx.doi.org/10.1016/S0140-6736\(18\)31224-8](http://dx.doi.org/10.1016/S0140-6736(18)31224-8).
- 478 5. Gutiérrez JM, Theakston RDG, Warrell DA (2006) Confronting the neglected problem of snake  
479 bite envenoming: The need for a global partnership. *PLoS Med* 3(6): e150. DOI:  
480 10.1371/journal.pmed.0030150.
- 481 6. Gutiérrez JM, Williams D, Fan HW, Warrell DA (2010) Snakebite envenoming from a global  
482 perspective: Towards an integrated approach. *Toxicon* 56: 1223-1235.  
483 doi:10.1016/j.toxicon.2009.11.020.
- 484 7. World Health Organisation (2017) Global snakebite burden. Report by the Director-General  
485 (EB142/17). Provisional agenda item 4.1. (18 Dec 2017).
- 486 8. Cruz LS, Vargas R, Lopes AA (2009) Snakebite envenomation and death in the developing  
487 world. *Ethnicity & Disease* 19: S1-42 - S1-46.
- 488 9. Harrison RA, Hargreaves A, Wagstaff SC, Faragher B, Lalloo DG (2009) Snake Envenoming: A  
489 disease of poverty. *PLoS Negl Trop Dis* 3(12): e569. doi:10.1371/journal.pntd.0000569.
- 490 10. Chippaux J-P, Akaffou MH, Allali BK, Dosso M, Massougbodji A, Barraviera B. The 6th  
491 international conference on envenomation by snakebites and scorpion stings in Africa: a crucial

- 492 step for the management of envenomation. *Journal of Venomous Animals and Toxins including*  
493 *Tropical Diseases* (2016) 22:11. doi: 10.1186/s40409-016-0062-y.
- 494 11. Simpson ID, Norris RL (2009) The global snakebite crisis - a public health issue misunderstood,  
495 not neglected. *Wilderness and Environmental Medicine* 20: 43-56.
- 496 12. Chippaux J-P (2017) Snakebite envenomation turns again into a neglected tropical disease!  
497 *Journal of Venomous Animals and Toxins including Tropical Diseases* (2017) 23:38  
498 doi:10.1186/s40409-017-0127-6.
- 499 13. Williams D, Gutiérrez JM, Harrison R, Warrell DA, White J, Winkel KD, Gopalakrishnakone P  
500 (2010) The global snake bite initiative: an antidote for snake bite. On behalf of the Global Snake  
501 Bite Initiative Working Group and International Society on Toxinology. *Viewpoint. The Lancet*  
502 375: 89-91.
- 503 14. Molesworth AM, Harrison R, Theakston RDG, Lalloo DG (2003) Geographic Information  
504 System mapping of snakebite incidence in northern Ghana and Nigeria using environmental  
505 indicators: a preliminary study. *Trans R Soc Trop Med & Hyg* 97: 188-192.
- 506 15. Hamza M, Idris MA, Maiyaki MB, Lamorde M, Chippaux J-P, Warrell DA, Kuznik A, Habib  
507 AG (2016) Cost-effectiveness of antivenoms for snakebite envenoming in 16 countries in West  
508 Africa. *PLoS Negl Trop Dis* 10(3): e0004568. doi:10.1371/journal.pntd.0004568.
- 509 16. Lam A, Camara B, Kane O, Diouf A, Chippaux J-P Epidemiology of snakebites in Kédougou  
510 region (eastern Senegal): comparison of various methods for assessment of incidence and  
511 mortality. *Journal of Venomous Animals and Toxins including Tropical Diseases* (2016) 22:9.  
512 DOI: 10.1186/s40409-016-0064-9.
- 513 17. Ghana Statistical Service (2014) - 2010 Population and Housing Census, Analytical Report for  
514 the Savelugu-Nanton District.  
515 ([http://www.statsghana.gov.gh/docfiles/2010\\_District\\_Report/Northern/SAVELUGU.pdf](http://www.statsghana.gov.gh/docfiles/2010_District_Report/Northern/SAVELUGU.pdf)).

- 516 18. Nkrumah, F, Klutse NAB, Adukpo DC, Owusu K, Quagraine KA, Owusu A, Gutowski Jr W  
517 (2014) Rainfall variability over Ghana: Model versus rain gauge observation. *International*  
518 *Journal of Geosciences* 5: 673-683. (<http://dx.doi.org/10.4236/ijg.2014.57060>).
- 519 19. Ntume R, Anywar G (2015) Ethnopharmacological survey of medicinal plants used in the  
520 treatment of snakebites in Central Uganda. *Current Life Sciences* (2015); 1 (1): 6-14.
- 521 20. LeCompte MD, Goetz JP (1982) Problems of reliability and validity in ethnographic research.  
522 *Review of Educational Research* 52(1): 31-60. <https://doi.org/10.3102/00346543052001031>.
- 523 21. Jones JPG, Andriamarivololona MM, Hockley N, Gibbons JM, Milner-Gulland EJ (2008)  
524 Testing the use of interviews as a tool for monitoring trends in the harvesting of wild species.  
525 *Journal of Applied Ecology* 45: 1205-1212.
- 526 22. Visser LE, Kyei-Faried S, Belcher DW (2004) Protocol and monitoring to improve snake bite  
527 outcomes in rural Ghana. *Transactions of the Royal Society of Tropical Medicine and Hygiene*  
528 98: 278-283. doi:10.1016/S0035-9203(03)00065-8.
- 529 23. Punguyire D, Baiden F, Nyuzaghl J, Hultgren A, Berko Y, Brenner S, Soghoian S, Adjei G,  
530 Niyogi A, Moresky R (2014) Presentation, management, and outcome of snake-bite in two  
531 district hospitals in Ghana. *Pan African Medical Journal* 2014; 19:219  
532 doi:10.11604/pamj.2014.19.219.5267.
- 533 24. Mensah EK, Karikari K, Aikins M, Vanotoo L, Sackey S, Oluabunwo C, Wurapa F, Sifah TK,  
534 Afari E Secondary analysis of snake bite data in the Western Region of Ghana: 2006-2010.  
535 *Ghana Med J* 2016; 50(2): 103-106 DOI: <http://dx.doi.org/10.4314/gmj.v50i2.8>.
- 536 25. Habib AG, Abubakar SB (2011) Factors affecting snakebite mortality in north-eastern Nigeria.  
537 *International Health* 3:50-55.



- 538 26. Tochie JN, Temgoua MN, Njim T, Celestin D, Tankeu R, Nkemngu NJ The neglected burden of  
539 snakebites in Cameroon: a review of the epidemiology, management and public health  
540 challenges. *BMC Res Notes* (2017) 10:405.
- 541 27. Gampini S, Nassouri S, Chippaux J-P, Semde Rasmané (2016) Retrospective study on the  
542 incidence of envenomation and accessibility to antivenom in Burkina Faso. *Journal of*  
543 *Venomous Animals and Toxins including Tropical Diseases* (2016) 22:10. DOI:  
544 10.1186/s40409-016-0066-7.
- 545 28. Tagwireyi DB, Ball DE, Nhachi CFB (2006) Differences and similarities in poisoning  
546 admissions between urban and rural health centers in Zimbabwe. *Clinical Toxicology* 44: 233-  
547 241.
- 548 29. Mbarouk GS, Sawe HR, Mfinanga JA, Stein J, Levin S, Mwafongo V, Runyon MS, Reynolds  
549 TA, Olson KR. Patients with acute poisoning presenting to an urban emergency department of a  
550 tertiary hospital in Tanzania. *BMC Res Notes* (2017) 10:482. DOI: 10.1186/s13104-017-2807-2.
- 551 30. Chippaux J-P Estimate of the burden of snakebites in sub-Saharan Africa: A meta-analytic  
552 approach. *Toxicon* 57 (2011) 586-599.
- 553 31. Sani UM, Jiya NM, Ibitoye PK, Ahmad MM (2013) Presentation and outcome of snake bite  
554 among children in Sokoto, North-Western Nigeria. *Sahel Medical Journal* 16:148-53.
- 555 32. Ghana Health Service (2017) The Health Sector in Ghana: Facts and Figures. Centre for Health  
556 and Information Management (CHIM), Policy Planning, Monitoring and Evaluation Division  
557 (PPMED). Report by collaborative partners; Ghana Health Service, Ministry of Health, Ghana  
558 Statistical Services, World Health Organization. 60 pp.  
559 [https://www.ghanahealthservice.org/downloads/FACTS+FIGURES\\_2017.pdf](https://www.ghanahealthservice.org/downloads/FACTS+FIGURES_2017.pdf).
- 560 33. Schioldann E, Mahmood MA, Kyaw MM, Halliday D, Thwin KT, Chit NN, et al. (2018) Why  
561 snakebite patients in Myanmar seek traditional healers despite availability of biomedical care at

- 562 hospitals? Community perspectives on reasons. *PLoS Negl Trop Dis* 12(2): e0006299.  
563 <https://doi.org/10.1371/journal.pntd.0006299>.
- 564 34. Sloan DJ, Dedicoat MJ, Lalloo DG (2007) Health-Seeking behaviour and use of traditional  
565 healers after snakebite in Hlabisa sub-district, KwaZulu Natal. *Tropical Medicine and*  
566 *International Health* 12(11): 1386-1390.
- 567 35. Habib AG (2013) Public health aspects of snakebite care in West Africa: perspectives from  
568 Nigeria. *Journal of Venomous Animals and Toxins including Tropical Diseases* 19:27.  
569 <http://www.jvat.org/content/19/1/27>.
- 570 36. Molander M, Staerk D, Nielsen HM, Brandner JM, Diallo D, Zacharie CK, van Staden J, Jäger  
571 AK (2015) Investigation of skin permeation, ex vivo inhibition of venom-induced tissue  
572 destruction, and wound healing of African plants used against snakebites. *Journal of*  
573 *Ethnopharmacology* 165:1-8. <http://dx.doi.org/10.1016/j.jep.2015.02.014>.
- 574 37. Molander M, Saslis-Lagoudakis CH, Jäger AK, Rønsted N (2012) Cross-cultural comparison of  
575 medicinal floras used against snakebites. *Journal of Ethnopharmacology* 139:863-872.  
576 doi:10.1016/j.jep.2011.12.032.
- 577 38. Chekole G (2017) Ethnobotanical study of medicinal plants used against human ailments in  
578 Gubalafto District, Northern Ethiopia. *Journal of Ethnobiology and Ethnomedicine* (2017) 13:55  
579 DOI 10.1186/s13002-017-0182-7.
- 580 39. Nnamani, CV, Ukwa EV (2015) Taxonomic diversity of medicinal plants utilized for traditional  
581 management of snakebite in southeast, Nigeria: Conservation for sustainability. *International*  
582 *Journal of Development and Sustainability* 4(12):1138-1152.
- 583 40. Habib AG, Kuznik A, Hamza M, Abdullahi MI, Chedi BA, Chippaux J-P, et al. (2015)  
584 Snakebite is Under Appreciated: Appraisal of Burden from West Africa. *PLoS Negl Trop Dis*  
585 9(9): e0004088. doi:10.1371/journal.pntd.0004088.

- 586 41. Brown NI (2012) Consequences of Neglect: Analysis of the Sub-Saharan African Snake  
587 Antivenom Market and the Global Context. *PLoS Negl Trop Dis* 6(6): e1670.  
588 doi:10.1371/journal.pntd.0001670.
- 589 42. Visser LE, Kyei-Faried S, Belcher DW, Geelhoed DW, van Leeuwen JS, van Roosmalen J  
590 (2008) Failure of a new antivenom to treat *Echis ocellatus* snake bite in rural Ghana: the  
591 importance of quality surveillance. *Transactions of the Royal Society of Tropical Medicine and*  
592 *Hygiene* 102:445-450. doi:10.1016/j.trstmh.2007.11.006.
- 593 43. Habib AG, Gebi UI, Onyemelukwe GC (2001) Snake bite in Nigeria. *Afr J Med Med Sci.*  
594 30(3):171-8.
- 595 44. Omogbai, EKI, Nworgu ZAM, Imhafidon MA, Ikpeme AA, Ojo DO, Nwako CN (2002)  
596 Snakebites in Nigeria: A study of Prevalence and Treatment in Benin City. *Tropical Journal of*  
597 *Pharmaceutical Research*:1(1): 39-44.
- 598 45. Ogunfowokan O (2012) Bite-to-hospital time and morbidity in victims of Viper bite in a rural  
599 hospital in Nigeria. *African Journal Primary Health Care & Family Medicine*4(1), Art. #371, 7  
600 pages. <http://dx.doi.org/10.4102/phcfm.v4i1.371>.
- 601 46. Paramonte B (2007) Snake bites in Nigeria. *Medical Journal of Therapeutics Africa*: 1(3):222-  
602 226.
- 603 47. Fadare JO, Afolabi OA (2012) Management of snake bite in resource-challenged setting: A  
604 review of 18 months experience in a Nigerian hospital. *Journal of Clinical Medicine and*  
605 *Research* 4(3):39-43. <http://www.academicjournals.org/JCMR>
- 606 48. Chafiq F, Hattimy FE, Rhalem N, Chippaux J-P, Soulaymani A, Mokhtari A, Soulaymani-  
607 Bencheikh R (2016) Snakebites notified to the poison control center of Morocco between 2009  
608 and 2013 *Journal of Venomous Animals and Toxins including Tropical Diseases* 22:8. DOI  
609 10.1186/s40409-016-0065-8.

- 610 49. Hattimy FE, Chafiq F, Hami H, Mokhtari A, Soulaymani A, Soulaymani-Bencheikh R (2018)  
611 Geographical distribution of health indicators related to snake bites and envenomation in  
612 Morocco between 1999 and 2013. *Epidemiology and Health* 40:e2018024.  
613 <https://doi.org/10.4178/epih.e2018024>.
- 614 50. Ochola FO, Okumu MO, Muchemi GM, Mbaria JM, Gikunju JK (2018) Epidemiology of snake  
615 bites in selected areas of Kenya. *Pan African Medical Journal* 29:217.  
616 doi:10.11604/pamj.2018.29.217.15366.
- 617 51. Sakajiki A, Ilah G, Lukman A-A, Yakasai A (2017) Snake bite envenomation seen at a specialist  
618 hospital in Zamfara state, North-Western Nigeria. *Annals of Tropical Medicine and Public*  
619 *Health*:10(2)p.391. Academic One File.
- 620 52. Nkwescheu A, Mbasso LCD, Pouth FBB, Dzudie A, Billong SC, Ngouakam H, Diffo JLD,  
621 Eyongorock H, Mbacham W (2016) Snakebite in bedroom kills a physician in Cameroon: a case  
622 report. *Pan African Medical Journal* 24:231. doi:10.11604/pamj.2016.24.231.7576.  
623 <http://www.panafrican-med-journal.com/content/article/24/231/full/>.
- 624 53. Tianyi F-L, Agbor VN, Tochie JN, Kadia BM, Nkwescheu AS (2018) Community-based audits  
625 of snake envenomations in a resource-challenged setting of Cameroon: case series. *BMC Res*  
626 *Notes* 11:317. <https://doi.org/10.1186/s13104-018-3409-3>.
- 627 54. Tianyi F-L, Dimala CA, Feteh VF (2017) Shortcomings in snake bite management in rural  
628 Cameroon: a case report. *BMC Res Notes* 10:196. DOI 10.1186/s13104-017-2518-8.
- 629 55. Enwere, GC, Obu HA, Jobarteh A (2000) Snake bites in children in The Gambia. *Annals of*  
630 *Tropical Paediatrics*: 20(2):121-124. ISSN 0272-4936 print/ISSN 1465-328/online/00/020121-  
631 04.

- 632 56. Ruiz-Casares M (2009) Unintentional Childhood Injuries in Sub-Saharan Africa: An Overview  
633 of Risk and Protective Factors. *Journal of Health Care for the Poor and Underserved* 20(4)  
634 Suppl.:51-67 (Article). Johns Hopkins University Press. DOI:  
635 <https://doi.org/10.1353/hpu.0.0226>.
- 636 57. Butler JA (1993) Seasonal Reproduction in the African Olive Grass Snake, *Psammophis*  
637 *phillipsi* (Serpentes: Colubridae). *Journal of Herpetology* 27(2):144-148.
- 638 58. Akani GC, Eniang EA, Ekpo IJ, Angelici FM, Luiselli L (2003) Food Habits of the Snake  
639 *Psammophis phillipsi* from the Continuous Rain-Forest Region of Southern Nigeria (West  
640 Africa). *Journal of Herpetology* 37(1):208-211.
- 641 59. Yahaya M (2010) The occurrence, distribution, diversity and toxicology of snakes in the  
642 Savelugu-Nanton District of the Northern Region of Ghana. MPhil. Thesis. Department of  
643 Animal Biology and Conservation Science, University of Ghana, Legon, Accra. 147 pages.

644

#### 645 **SUPPORTING INFORMATION**

646 S1 Checklist. STROBE checklist.

647 Checklist of items for this observational cross-sectional study.

649 **Figures**

650 **Figure 1** Map of the Savelugu-Nanton District in northern Ghana, showing major roads, rivers,  
651 and the seven selected townships for the study. Line drawings produced with  
652 CorelDraw™ version 12.

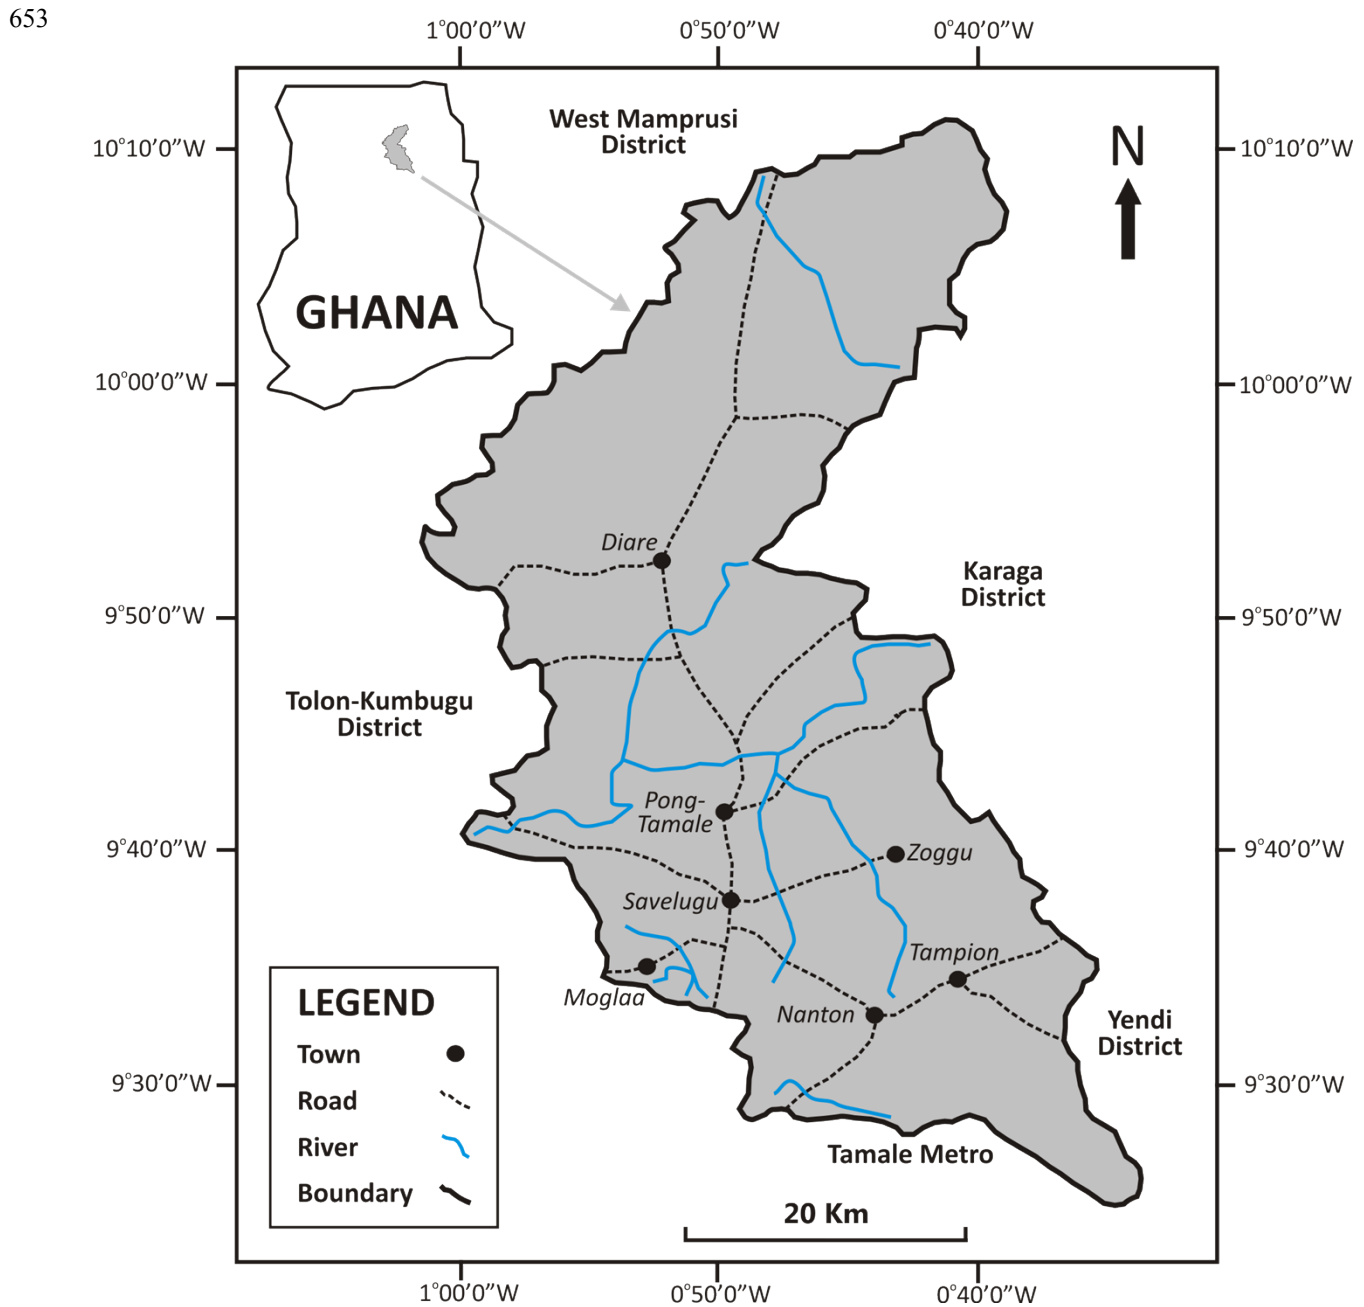

655 **Figure 2** Mean monthly precipitation (black circles and solid line) and mean monthly number  
656 of snakebite incidences (grey triangles and broken line) recorded at the Savelugu  
657 District Hospital (1999-2008).

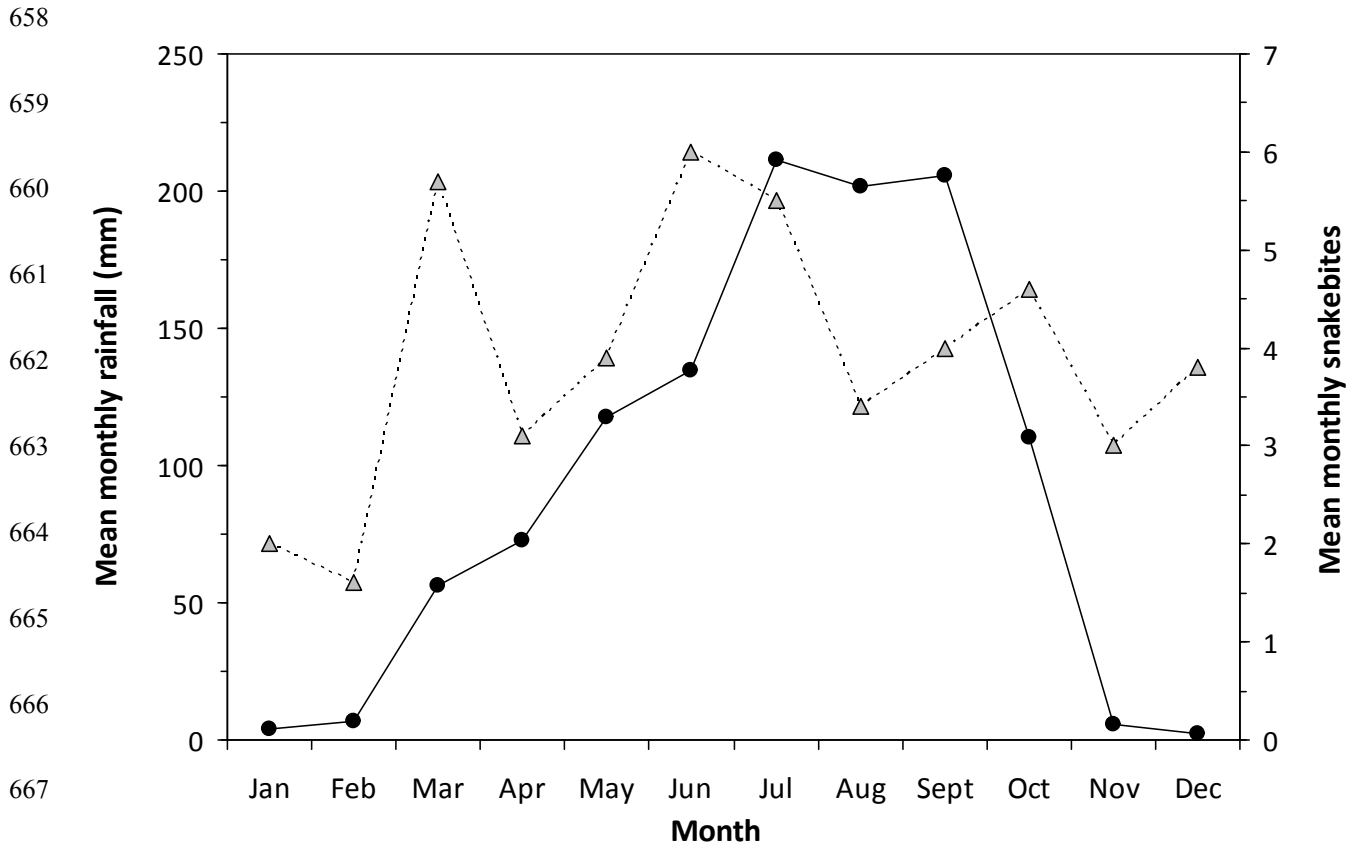

669 **Figure 3** Correlation between mean monthly precipitation and mean monthly number of  
670 snakebite incidences recorded at the Savelugu District Hospital (1999-2008).

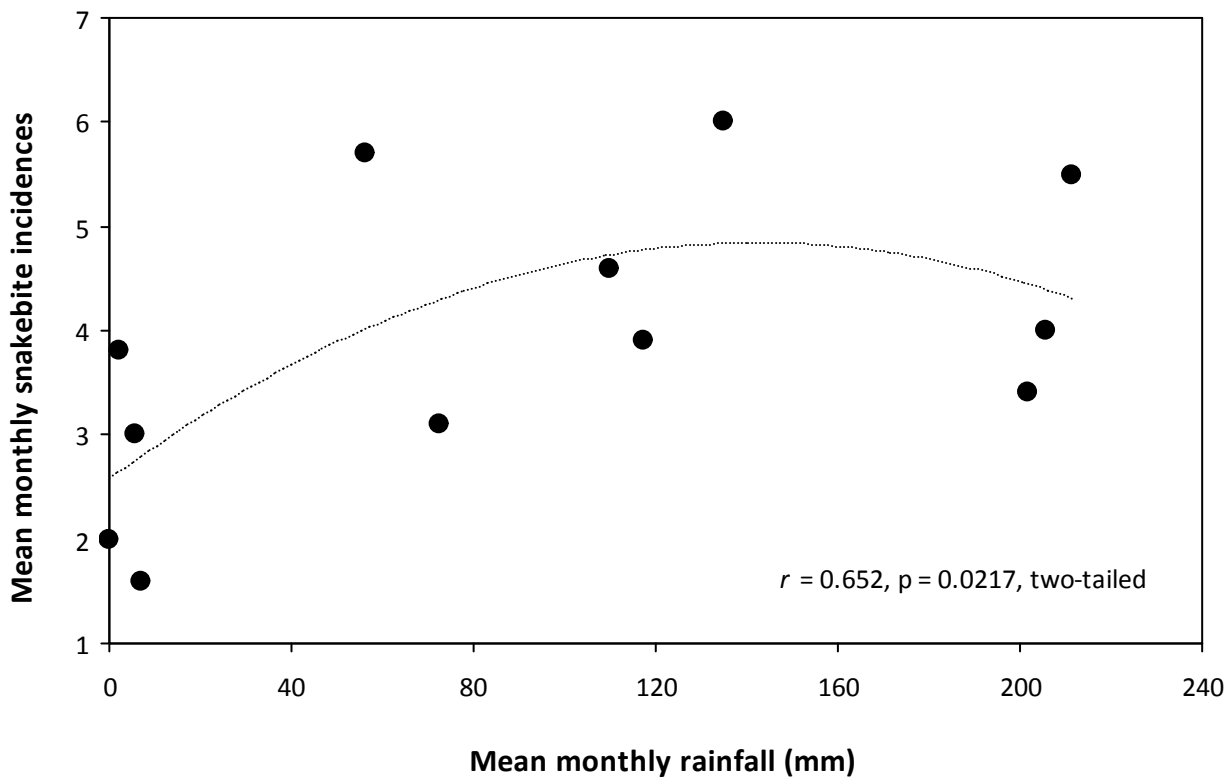



672 **Tables**

673 **Table 1** Basic socio-demographic characteristics and snake-conflict encounter statistics of the  
674 respondent community population (n = 1,000 residents) comprising seven communities  
675 surveyed in the Savelugu-Nanton District of northern Ghana (Dec 2008-May 2009).

676

| <b>Respondent variable</b>                   | <b>No. of respondents (%)</b> |
|----------------------------------------------|-------------------------------|
| Males                                        | 500 (50.0)                    |
| Females                                      | 500 (50.0)                    |
| <15 years old                                | 300 (30.0)                    |
| 15-30 years old                              | 300 (30.0)                    |
| >30 years old                                | 400 (40.0)                    |
| No formal education (illiteracy)             | 518 (51.8)                    |
| Basic primary school level (7-9 yrs)         | 439 (43.9)                    |
| Secondary school level (10-12 yrs)           | 39 (3.9)                      |
| Tertiary educational level (> 12 yrs)        | 4 (0.4)                       |
| Experienced a snake-conflict encounter       | 934 (93.4)                    |
| Experienced a snakebite personally (E)       | 58 (5.8)                      |
| Witnessed a snakebite in their community (W) | 799 (79.9)                    |
| Total snakebite incidences reported (E+W)    | 857 (85.7)                    |

678 **Table 2** Associations of reported personal snakebite incidences (n = 58) with gender and age-  
679 group of 1,000 community members (male/female = 500 each) interviewed in the  
680 Savelugu-Nanton District of northern Ghana (Dec 2008-May 2009).

681

| Variable | Sub-group variable | Frequency (%) | Test-statistics                | p-value |
|----------|--------------------|---------------|--------------------------------|---------|
| Gender   | Male               | 36 (62.1)     | Fisher's exact test (2×2)      | 0.0778  |
|          | Female             | 22 (37.9)     |                                |         |
| Age      | <15 years          | 11 (19.0)     | $\chi^2$ G-test (2×3) = 14.616 | 0.00067 |
|          | 15-30 years        | 10 (17.2)     |                                |         |
|          | >30 years          | 37 (63.8)     |                                |         |

682

684 **Table 3** Characteristics of personal snake-conflict encounters reported (n = 934 incidences)  
685 among 1,000 community members interviewed in the Savelugu-Nanton District of  
686 northern Ghana (Dec 2008-May 2009).

687

| <b>Respondent variable</b>      | <b>Sub-group variable</b> | <b>Encounters (%)</b> |
|---------------------------------|---------------------------|-----------------------|
| Encountering habitat location   | Farmlands                 | 604 (64.7)            |
|                                 | Bushes                    | 145 (15.5)            |
|                                 | House and yards           | 100 (10.7)            |
|                                 | Paths and roads           | 60 (6.4)              |
|                                 | School facilities         | 19 (2.0)              |
|                                 | Open city drains          | 6 (0.6)               |
| Encountering time of the day    | Afternoon                 | 471 (50.5)            |
|                                 | Morning                   | 372 (39.8)            |
|                                 | Evening and night         | 91 (9.7)              |
| Encountering season of the year | Rainy season              | 669 (71.6)            |
|                                 | Dry season                | 265 (28.4)            |

688

690 **Table 4** Snakebite cases reported by each of 604 respondents out of 1,000 community members  
691 interviewed in the Savelugu-Nanton District of northern Ghana (Dec 2008-May 2009).

692

| <b>Cases</b> | <b>Respondents</b> | <b>Total</b> |
|--------------|--------------------|--------------|
| One          | 449                | 449          |
| Two          | 121                | 242          |
| Three        | 30                 | 90           |
| Four         | 3                  | 12           |
| Six          | 1                  | 6            |
| <b>Total</b> | <b>604</b>         | <b>799</b>   |

693

695 **Table 5** Comparison of perceptual characteristics of snakebite victims and incidences based on  
 696 household surveys (\*n<sub>max</sub> = 857 cases) and traditional medical practitioners (TMP; \*\*n =  
 697 24 respondents; \*\*\*n = 42 and 65 cases), respectively among 1,000 community members  
 698 and 24 TMPs, interviewed in the Savelugu-Nanton District of northern Ghana (Dec  
 699 2008-May 2009).

| Respondent variable<br>(n = responses)                   | Sub-group variable                  | Survey frequency (%) |           |
|----------------------------------------------------------|-------------------------------------|----------------------|-----------|
|                                                          |                                     | Household            | TMP       |
| Gender<br>(*n = 833; **n = 24)                           | Male                                | 584 (70.1)           | 22 (91.7) |
|                                                          | Female                              | 249 (29.9)           | 2 (8.3)   |
| Age-group of victim<br>(*n = 412; **n = 24)              | 15-30 years                         | 222 (53.9)           | 13 (54.2) |
|                                                          | >30 years                           | 146 (35.4)           | 10 (41.6) |
|                                                          | <15 years                           | 44 (10.7)            | 1 (4.2)   |
| Day time hours of snakebite<br>(*n = 828; **n = 24)      | Morning                             | 334 (40.3)           | 11 (45.8) |
|                                                          | Afternoon                           | 315 (38.0)           | 10 (41.7) |
|                                                          | Evening and night                   | 179 (21.6)           | 3 (12.5)  |
| Season of snakebite<br>(*n = 857; **n = 24)              | Rainy season                        | 610 (71.2)           | 20 (83.3) |
|                                                          | Dry season                          | 247 (28.8)           | 4 (16.7)  |
| Habitat location of snakebite<br>(*n = 670; **n = 24)    | Farmlands                           | 543 (81.0)           | 16 (66.6) |
|                                                          | Bushes                              | 56 (8.4)             | 7 (29.2)  |
|                                                          | House and yards                     | 54 (8.1)             | -         |
|                                                          | Paths and roads                     | 5 (0.7)              | 1 (4.2)   |
|                                                          | School facilities                   | 9 (1.3)              | -         |
| Position of snakebite infliction<br>(*n = 828; **n = 24) | Open city drains                    | 3 (0.5)              | -         |
|                                                          | Legs and feet                       | 540 (65.2)           | 19 (79.2) |
|                                                          | Arms and hands                      | 280 (33.8)           | 5 (20.8)  |
|                                                          | Head                                | 7 (0.8)              | -         |
| Symptoms most often reported<br>(*n = 821; ***n = 42)    | Trunk                               | 1 (0.1)              | -         |
|                                                          | Swelling                            | 431 (52.5)           | 14 (33.3) |
|                                                          | Bleeding                            | 320 (38.9)           | 20 (47.6) |
|                                                          | Local pain                          | 67 (8.2)             | -         |
|                                                          | Dizziness                           | 3 (0.4)              | -         |
|                                                          | Blood spitting                      | -                    | 4 (9.5)   |
|                                                          | Sweating                            | -                    | 2 (4.8)   |
| Shivering                                                | -                                   | 2 (4.8)              |           |
| Likely causal snake species<br>(***n = 65)               | Carpet Viper                        | n/a                  | 23 (35.4) |
|                                                          | Night Adder                         | n/a                  | 17 (26.2) |
|                                                          | Black-necked Spitting Cobra         | n/a                  | 13 (20.0) |
|                                                          | Puff Adder/other <i>Bitis</i> sp.   | n/a                  | 8 (12.2)  |
|                                                          | Grass snakes/ <i>Psammophis</i> sp. | n/a                  | 4 (6.2)   |

700  
 701 \*Household survey: For cases where total responses n<sub>tot</sub> < 857, are explained by failure of respondents to  
 702 recall details.

704 **Table 6** Statistically-tested associations of snakebite cases (n = 450) with gender and age-group  
705 reported at the Savelugu-Nanton District Hospital in northern Ghana (1999-2008).

706

| <b>Sub-group variable</b> | <b>Gender</b>    |                    | <b>Total (%)</b> |
|---------------------------|------------------|--------------------|------------------|
|                           | <b>Males (%)</b> | <b>Females (%)</b> |                  |
| <b>Age group (years)</b>  |                  |                    |                  |
| <15                       | 90 (20.0)        | 12 (2.7)           | 102 (22.7)       |
| 15-44                     | 133 (29.6)       | 91 (20.2)          | 224 (49.8)       |
| >44                       | 73 (16.2)        | 51 (11.3)          | 124 (27.5)       |
| Total                     | 296 (65.8)       | 154 (34.2)         | 450 (100.0)      |

Statistical Test:  $\chi^2$  G-test (2×3) = 29.56, p < 0.00001, df = 2

707

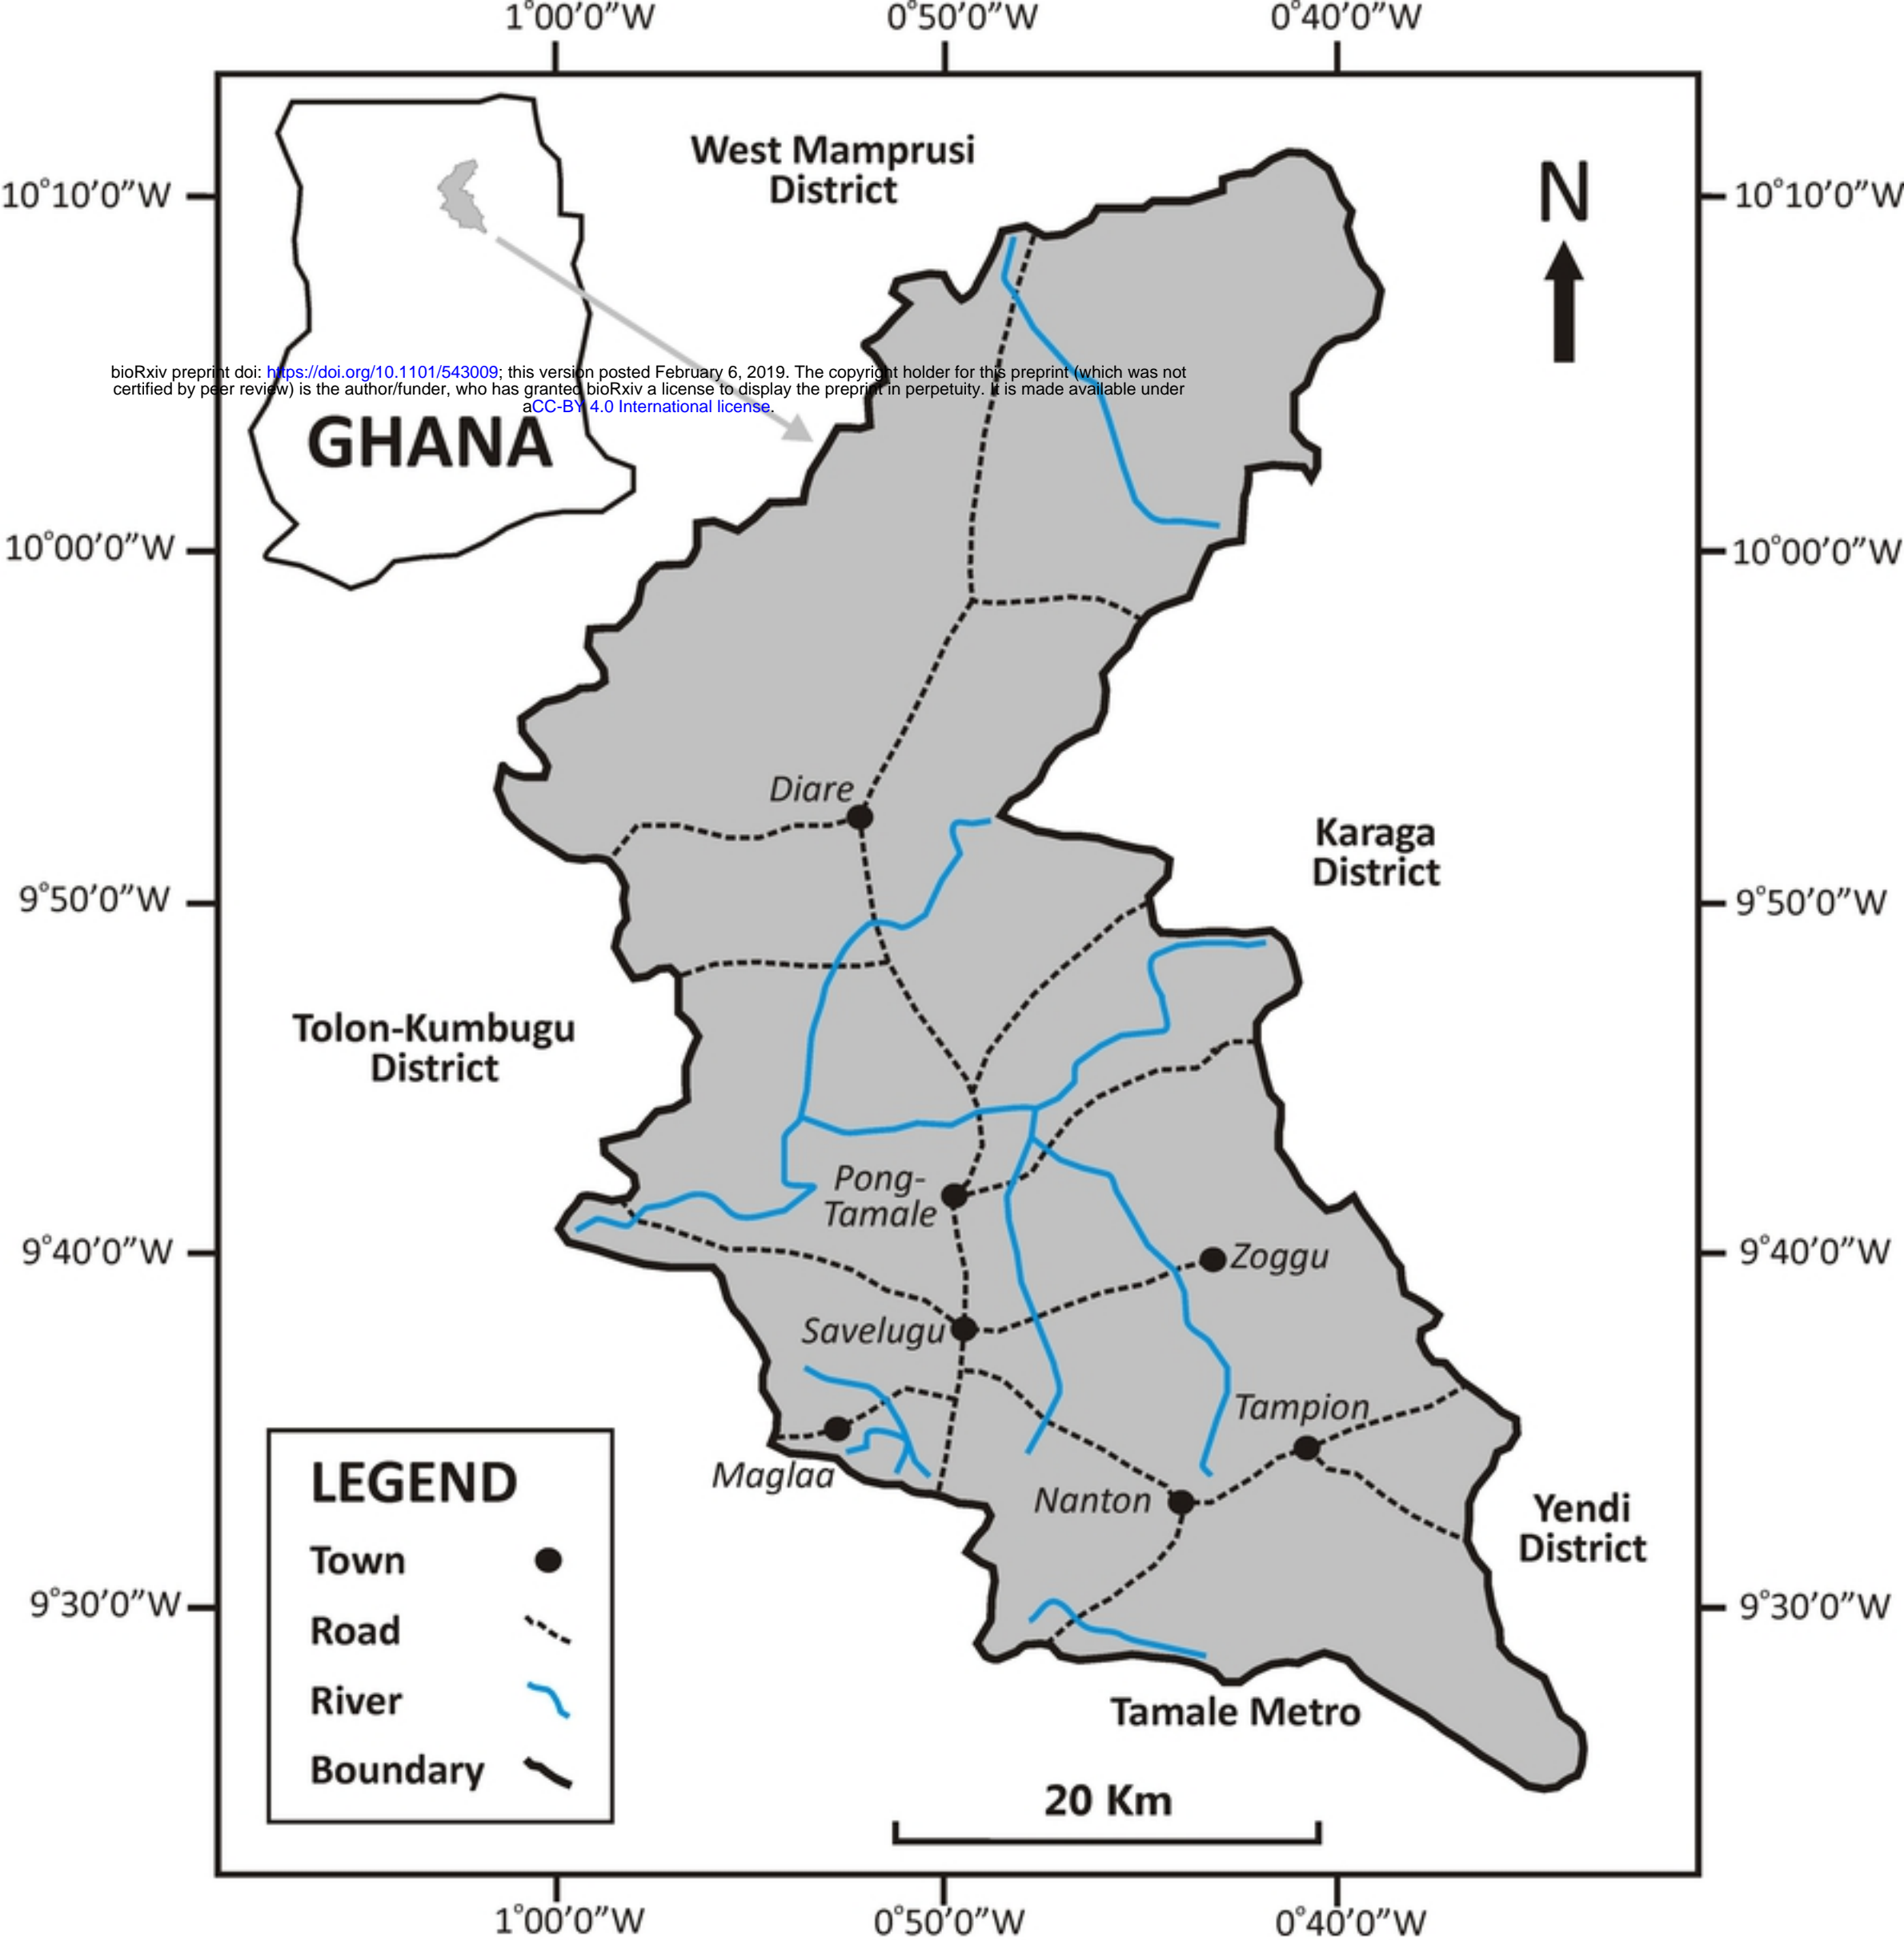

Figure

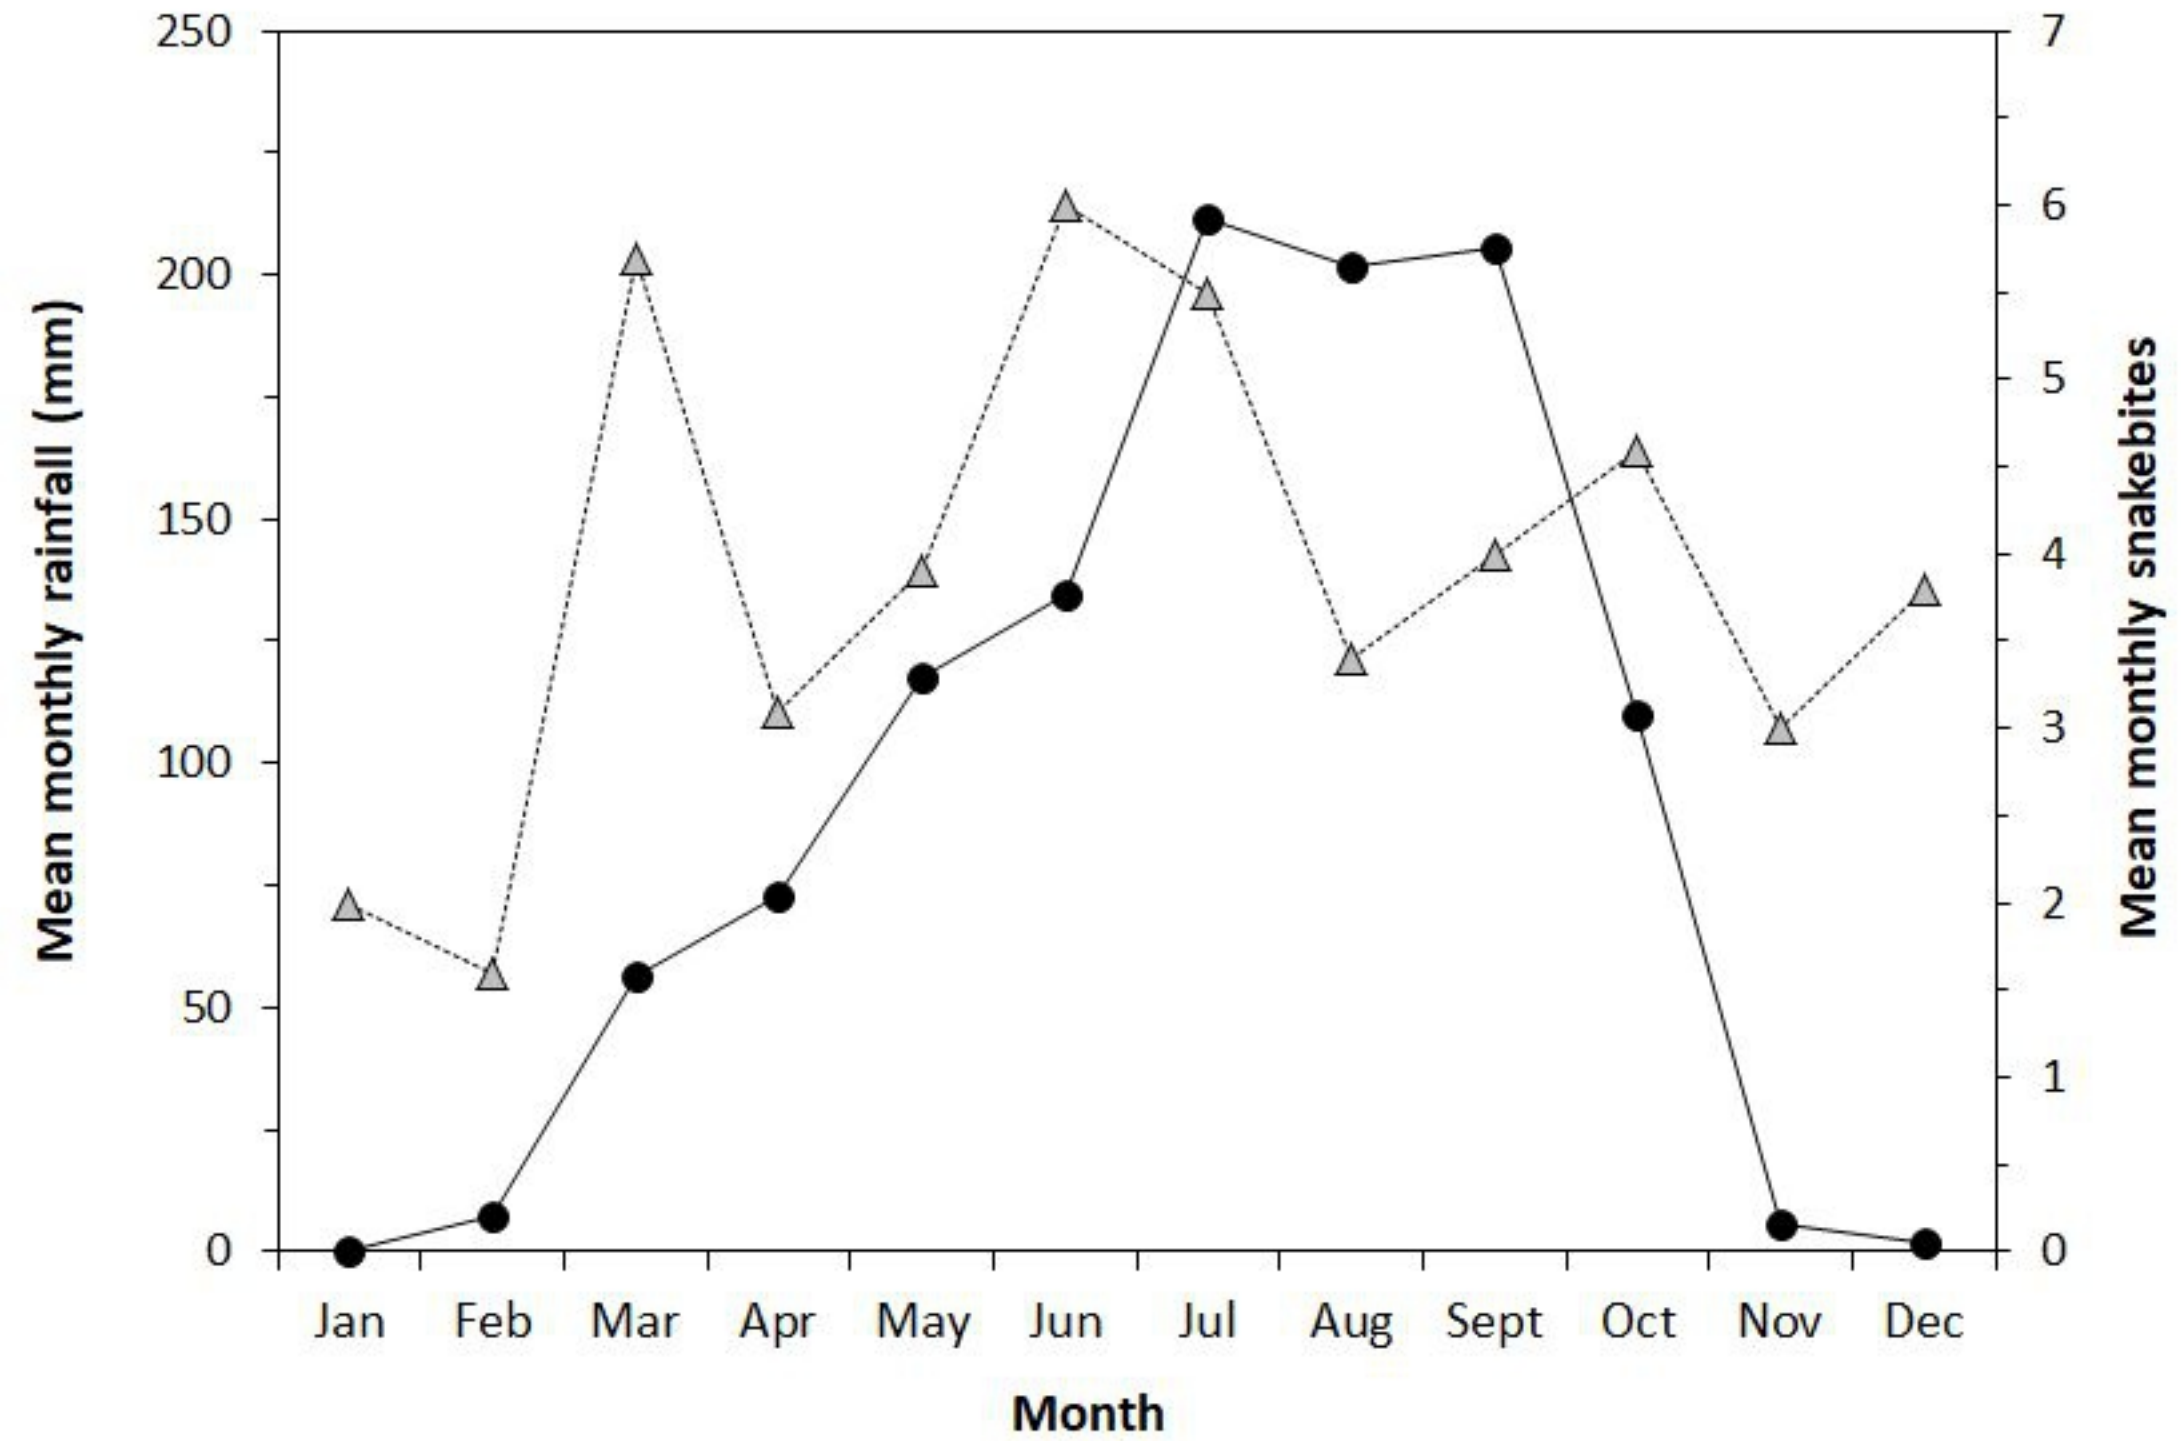

Figure



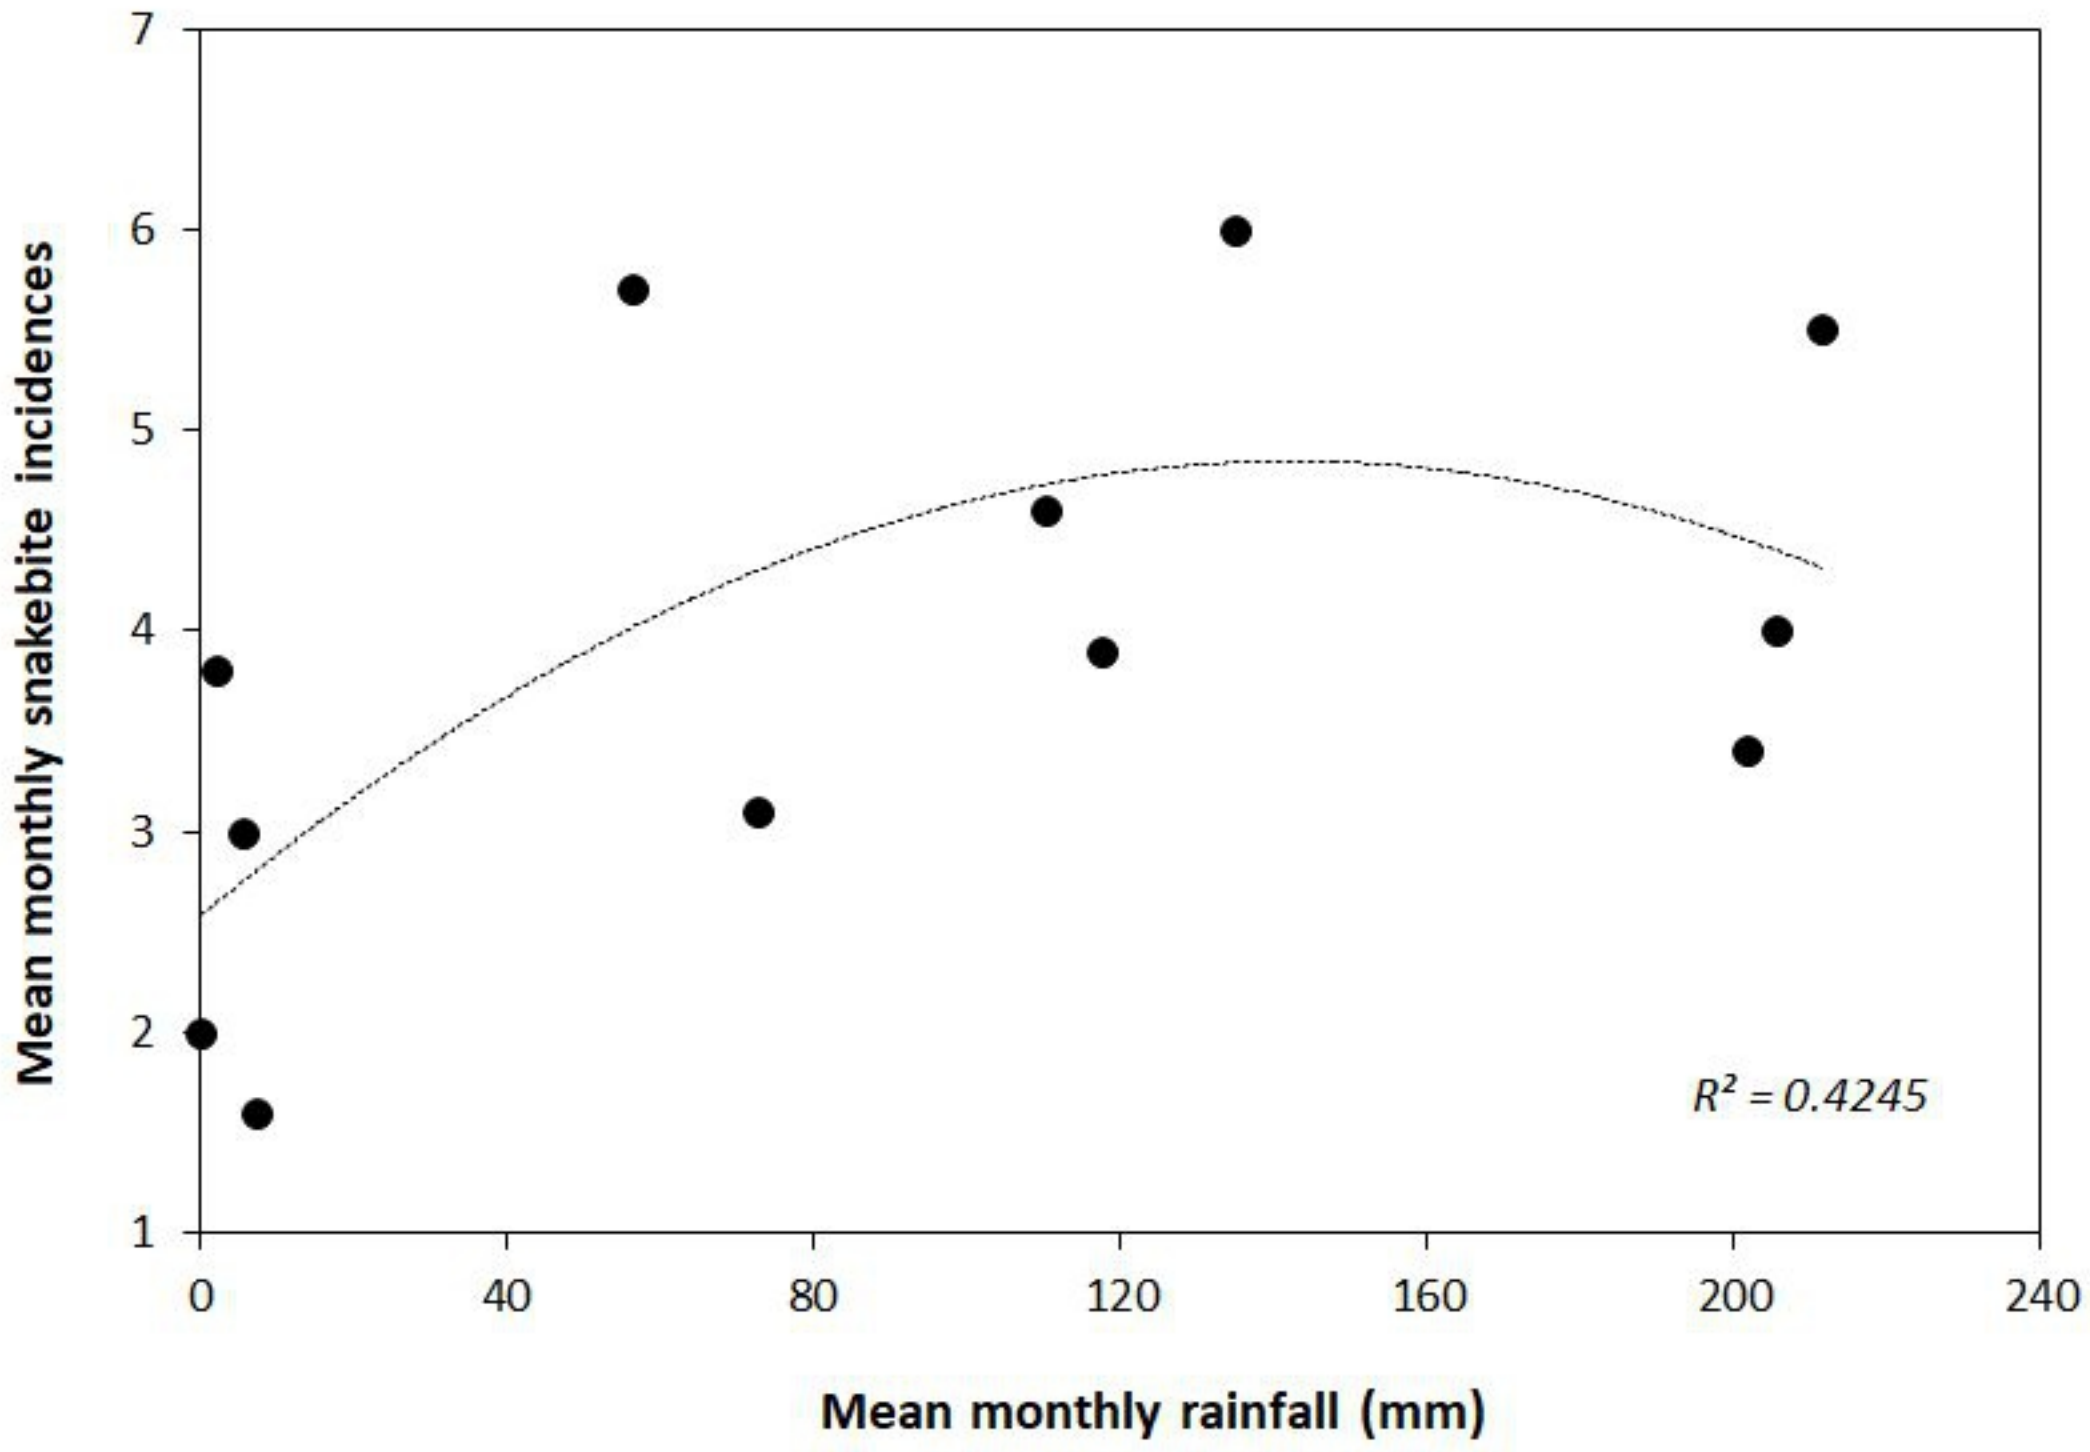

Figure
